# Supplementary material for: Dose intensification of TRAIL-inducing ONC201 inhibits metastasis and promotes intratumoral NK cell recruitment
Source: JCI journal article supplement (doi:10.1172/jci96711), 2018-03-20
Supplement: sd1 [file 1]

## **Supplemental Figure Legends**

**Supplemental Figure 1: Dose intensification impacts tumor growth in multiple tumor types.** Final tumor measurements of A) HCT116 p53<sup>-/-</sup> B) HT29 C) HT-29 xenograft-bearing mice treated with 50 mg/kg ONC201 dosed at indicated frequencies and D) Single mouse images of HT29 xenografts from mice treated as shown. E) MRI of 100 mg/kg per 1 week and vehicle after 8 wks. (N=6 in HT29 and HCT116 p53-null, N=4 in MDA-MB-231).

**Supplemental Figure 2: Oral vs IP administration, and weekly vs daily dosing of ONC 201 have comparable effects.** A) Final relative tumor growth of HT29 xenografts treated as shown B) Tumor growth of HT29 in mice treated as indicated for 100 mg/kg ONC201 treatments (Twice a week was on a Monday/Thursday schedule) and C) Final percent tumor growth of these cohorts. (For mouse studies, N=4 for each). (P values are as indicated: \*\* < 0.01, \*\*\* < 0.001 compared to the vehicle unless indicated using 2-side Wilcoxon rank sum test).

**Supplemental Figure 3: Increased ONC201 dose and frequency does not increase toxicity.** A) Pathology of athymic nude mice treated with 100 mg/kg weekly vs vehicle. No lesions noted. N=3. B) Toxicology chemistry serum panel of indicated cohorts in athymic nude mice. Toxicology results highlighted. C) Weight of HT29 xenografts from 100 mg/kg cohorts. (N=6 for HCT116 and HT29 studies).

**Supplemental Figure 4: Expression of TRAIL, ATF4, and CHOP increase as a result of increased frequency of ONC201 administration.** A) ATF4 and CHOP mRNA expression in xenografts from mice treated as shown. B) TRAIL standard curve and controls. Positive control: spiked serum to 100 pg/ml. TRAIL serum levels shown correlated to (top): frequency, and (bottom): dose. C) Serum TRAIL levels in MDA-MB-231 xenograft mice at indicated doses and frequencies. D) TRAIL IHC analyses in mice treated with indicated ONC201 dose and frequency. All samples were harvested 4 weeks after

treatment began unless indicated. (For qRTPCR: N=6, ran twice in triplicate of each sample. For ELISA, n=4 ran in duplicate, samples were frozen until end of assay and ran through ELISA) (P values are as indicated: \* < 0.05, \*\* < 0.01 compared to the vehicle unless indicated using 2-side Wilcoxon rank sum test).

**Supplemental Figure 5: HT29, CT26, and MDA-MB-231 xenograft models are metastatic and ONC201 suppresses metastasis *in vivo*.** A) Bioluminescence and gross imaging of HT29 metastasis in the abdomen. B) Final volume of HT29 primary tumors and metastases in mice treated as indicated. C) Total metastatic tumors (micro or bulk), measured size, and internal locations in HT29-xenograft-bearing mice of described cohorts. D) Bioluminescence imaging of HT29 xenograft-bearing mouse liver and lungs treated at two different frequencies of ONC201 administration at a dose of 25 mg/kg E) MRI of vehicle-treated mice with HT29 xenografts shows 4 tumors. F) Gross, bioluminescent, and histological imaging of metastatic tumors of MDA-MB-231 xenografts. G) CT26 lung metastases observed in the vehicle-treated mice and total number of metastases seen in each cohort. H) Estimated size of HCT116-tail vein treated mice before and after treatment with vehicle and/or ONC201. I) Number of confirmed metastases in mice that were treated with Vehicle and/or ONC201 24 hours after tail vein injection of HCT116 xenograft samples. (N=10 in CT26, N=6 in HT29, N=4 in MDA-MB-231, N=5 in HCT116 tail vein injected mice). All colorectal xenograft samples were harvested 4 weeks after treatment began unless indicated, MDA-MB-231 was harvested after 6 weeks of treatment. (P value as indicated: \* < 0.05 compared to the vehicle unless indicated using 2-side Wilcoxon rank sum test, for h: difference between post/pre-treatment compared using 2-side Wilcoxon rank sum test).

**Supplemental Figure 6: ONC201 suppresses migration and invasion *in vitro*.** A) Xcelligence invasion kinetics assay using 1:40 matrigel and HCT116 p53<sup>-/-</sup> cells. Number of cells migrated in Boyden chamber assay after 48 hr of described cohorts in B) HCT116 p53<sup>-/-</sup>, (C) HCT116 *Bax*<sup>-/-</sup> ONC201-apoptosis resistant cells, and (D) HT-29 cells by boyden assay after 48 hr. E) Boyden cell

migration of MDA-MB-231 ONC201- and RIK2-treated cells. F) Scratch assay of MDA-MB-231 cells before treatment and 48 hr after treatment. G) Number of metastases per mouse of MDA-MB-231 wildtype or shTRAIL injected through tail vein injection and treated with Vehicle or ONC201 immediately after. H) Representative lung tumor images. I) Lung H&E images from tail vein mice. (For in vitro migration/invasion studies, N=4 ran two separate times. For mouse tumor studies, N=5 for MDA-MB-231 and MDA-MB231 shTRAIL. All samples were harvested 3 weeks after treatment began unless indicated). (P value as indicated: \*\* < 0.01 compared to the vehicle unless indicated using 2-side Wilcoxon rank sum test. For g, metastases were grouped '<2' and '≥2' for the comparison between wildtype and shTRAIL ONC201 groups using 2-sided Fisher's exact test, there was no significant difference).

**Supplemental Figure 7: Schematic of gating procedure for NK/T cells and activated NK cells.**

Singlets followed by lymphocytes where gated for vehicle tumors, ONC201 treated tumors, spleen samples, and PBMC. There was a larger volume of infiltrating lymphocytes in ONC201 vs Vehicle so there were more cells analyzed when lymphocytes where gated. A) Lymphocytes where analyzed by CD45 vs CD19; and CD45+/CD19- (non-B cell CD45 population) was selected. Cells where then analyzed NK vs CD3. B) Lymphocytes where analyzed by CD45 vs CD19; and CD45+/CD19- (non-B cell CD45 population) was selected. NK+ cells where then selected by side scatter and activated NK cells were analyzed using granzyme.

**Supplemental Figure 8: Schematic of gating procedure for T cell recruitment and MDSC.**

Singlets where gated for vehicle tumors, ONC201 treated tumors, spleen samples, and PBMC. A) Lymphocytes where selected, there were a larger volume of infiltrating lymphocytes in ONC201 vs Vehicle so there were more cells analyzed when lymphocytes where gated. Lymphocytes where analyzed by CD45 vs CD19; and CD45+/CD19- (non-B cell CD45 population) was selected. CD3+ cells where then selected by side scatter and cells were analyzed by CD4 vs CD8. B) Lymphocytes where selected, followed by PI

staining, CD45 vs CD19; and the CD45+/CD19- (non-B cell CD45 population) was selected. CD3 and NKp46 were individually selected and then PD-1 staining assessed.

**Supplemental Figure 9: ONC201 is efficacious in syngeneic models and has increased NK cells and T cells in both tumor bearing and non-tumor bearing mice.**

A) Tumor volume over time of MC38 xenografts in wildtype C57/BL6 mice. B) Quantitation of GFP+ cells in tumor sections in NCR1-GFP mice bearing MC38 xenografts after 4 weeks. C) Analysis of lymphocytes, NK cells, CD3 cells, and CD3+ cell differentiation in MC38 xenografts in NCR1-GFP mice after 4 weeks. D)

Immunohistochemistry of MC38 tumors in NCR1-GFP C57/BL6 mice of GFP-expressing tumors (top) and CD3+ cells (bottom). E) % of CD3+ cells and NKp46+ Cells within the singlet, leukocytes, PI-, CD45+ population of PBMC in C57/BL6 non-tumor bearing mice. F) Percent IFN $\gamma$ + NK cells within the MC38-GFP mice in lymphocyte CD45+ CD19- NK+ cell population in vehicle and ONC201 treated mice. G) Analysis of T-cells in MC38 tumors in NCR1-gfp mice. Analysis of T cells, NK cells, granzyme, and CD4/CD8 expression on tumors was performed on lymphocytes, which were greater by ONC201 treatments, then CD45+/CD19- population. All treatments were with vehicle or 100mg/kg ONC201 weekly delivered orally. (For mouse studies, N=6 in wildtype C57/BL6 study. N=4 in NCR1-GFP study. N=7 in Balb/c study, for immunofluorescence studies, 4 IF slides were analyzed per tumor). (P value as indicated: \* p < 0.01, \*\*\*\* p < 0.001 using 2-side Wilcoxon rank sum test; for GFP IF studies when 4 IF slides were analyzed per tumor, the mean of each tumor were compared using a 2-sided Wilcoxon rank sum test).

**Supplemental Figure 10: Primary NK cells from healthy donors are activated by ONC201.**

A) Purified primary NK cells schematic for IFN $\gamma$  assay. B) Schematic for Lamp1+ assay. C) Results of a second patient on IFN $\gamma$  expression in increasing doses of ONC201. D) LAMP1+ expression of 5 patients with vehicle or ONC201. (N=4) (P value as indicated: \* p < 0.01 using 2-side Wilcoxon rank sum test).

**Supplemental Figure 11: NK cells play a role efficacy of ONC201 in vivo.** A) Tumor volume after 5 weeks in RKO-ONC201 resistant tumor types. B) Final tumor volume after 4 weeks in ONC201 treated MC38 bearing C57/BL6 mice treated with Vehicle, ONC201 and/or GM-1. C) Representative image of ONC201 and GM1 study. D) Final tumor volume after 4 weeks in ONC201 treated MC38 bearing C57/BL6 mice or C57/BL6 Perforin knockout (*Prf<sup>-/-</sup>*) mice treated with Vehicle or ONC201. E) Representative image of ONC201 Perforin<sup>-/-</sup> study. F) Final tumor volume after 4 weeks in ONC201 treated MC38 bearing C57/BL6 mice treated with Vehicle, ONC201 and/or CD-8 inhibitor. G) Representative image of ONC201 and CD-8 inhibitor study. All treatments were of vehicle and 100mg/kg ONC201 weekly delivered orally. GM-1 delivered every 5 days i.p. CD8 twice weekly 400ug i.p. (For mouse studies, RKOTR N=9 except GM-1 cohort which was N=5, all MC38 studies N=5). (P value as indicated: \* p < 0.01 using 2-side Wilcoxon rank sum test).

**Supplemental Figure 12: Immune infiltrates were not seen in lung metastases.** NK and CD3<sup>+</sup> population within the lymphocyte CD45<sup>+</sup>/CD19<sup>-</sup> populations in A) HCT116 lung metastases B) HCT116 *Bax<sup>-/-</sup>* lung metastases C) MC38 lung metastases D) Spleen controls from each mouse experiment. ONC201 treatment 100 mg/kg weekly dosed orally. For mouse studies, N=5 for all experiments.

**Supplemental Figure 13: ONC201's efficacy is both from intrinsic cell death and NK-related.** A) Final tumor volumes in athymic nude mice injected with HCT116 *Bax<sup>-/-</sup>* or wildtype xenografts treated for 4 weeks with Vehicle, ONC201, and/or GM-1. B) Representative images. C) Final tumor volume in NSG mice injected with HCT116 *Bax<sup>-/-</sup>* xenografts treated with Vehicle or ONC201. D) Representative images. E) Quantification of Ki67<sup>+</sup> cells from IHC staining of tumor samples from mice in supplemental figure 13. F) Quantification of cleaved caspase-3 + xenografts from IHC staining of tumor samples from mice supplemental figure 13. G) Representative images. All treatments were of vehicle

and 100 mg/kg ONC201 weekly delivered orally. GM-1 delivered every 5 days i.p. (For mouse studies, N=6). Tumor sample sections are total quantification of entire slide, 2 slides per tumor imaged using Vectra software. (P values: \*  $p < 0.05$ , \*\*\*  $p < 0.005$  using 2-side Wilcoxon rank sum test in respect to vehicle, for IHC studies when 2 IHC slides were analyzed per tumor, the mean of each tumor were compared using a 2-sided Wilcoxon rank sum test).

**Supplemental Figure 14: ONC201 and PD-1 in combination may be beneficial.** A) Final tumor volume after 4 weeks of MC38 tumors treated with Vehicle, 25 mg/kg ONC201, and/or PD-1. B) Final tumor volume after 4 weeks of MC38 tumors treated with Vehicle, 50 mg/kg ONC201, and/or PD-1. C) Final tumor volume after 4 weeks of MC38 tumors treated with Vehicle, 100 mg/kg ONC201, and/or PD-1. D) PD-1 flow cytometry analysis of PD-1 expression on T cells in CT26 tumors. E) Example of analysis of PD-1 and PD-1 PE staining on a ONC201 tumor. F) Final tumor volumes of MC38 bearing mice treated with Vehicle, ONC201, GM-1, and/or PD-1 including ONC201 + PD-1 + GM1 G) Representative images. All treatments where of vehicle and 100 mg/kg ONC201 weekly delivered orally unless specified. GM-1 delivered every 5 days and PD-1 200 ug every 3 days. (For mouse studies: CT26 PD1 N=7. MC38 PD-1 N=6). (P value as indicated: \*  $p < 0.05$  using 2-side Wilcoxon rank sum test).

**Supplemental Figure 15: Multiplex analysis of pro-immune factors and chemokines upregulated by ONC201.** P value as indicated: \*  $p < 0.05$ , \*\*  $p < 0.01$ , \*\*\*  $p < 0.001$ , \*\*\*\*  $p < 0.0001$  using 2-side Wilcoxon rank sum test, three separate conditioned media samples per cohort where harvested and ran in duplicate. The mean of each duplicate was taken and compared using a 2-sided Wilcoxon rank sum test.

**Supplemental Figure 16: NK92 cells are activated and secrete TRAIL following treatment with ONC201.** A) After 24 hr of 10  $\mu$ M treatment of ONC201 and co-cultured in the presence or absence of A) HCT116p53<sup>-/-</sup> cells or B) MDA-MB-231 cells, NK92 cells express TRAIL and activation markers by flow cytometry. C) Co-culture results Live:Dead ratio of HCT116 *Bax*<sup>-/-</sup> D) Effects on HCT116 tumor cell viability based on CTG assay of co-culture with described cohorts, NK cells where aspirated

before cell titer glo was added. E) Cell viability of CTG results. (N=3, co-cultures ran in triplicate twice). (P value as indicated: \* < 0.05, \*\* < 0.01, \*\*\* p < 0.001 compared to the vehicle, the mean of each duplicate were taken and compared using a 2-sided Wilcoxon rank sum test.)

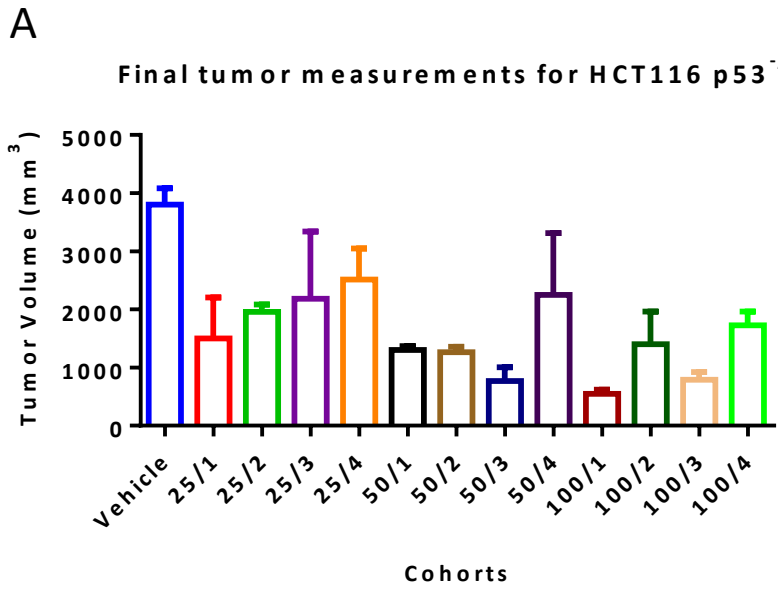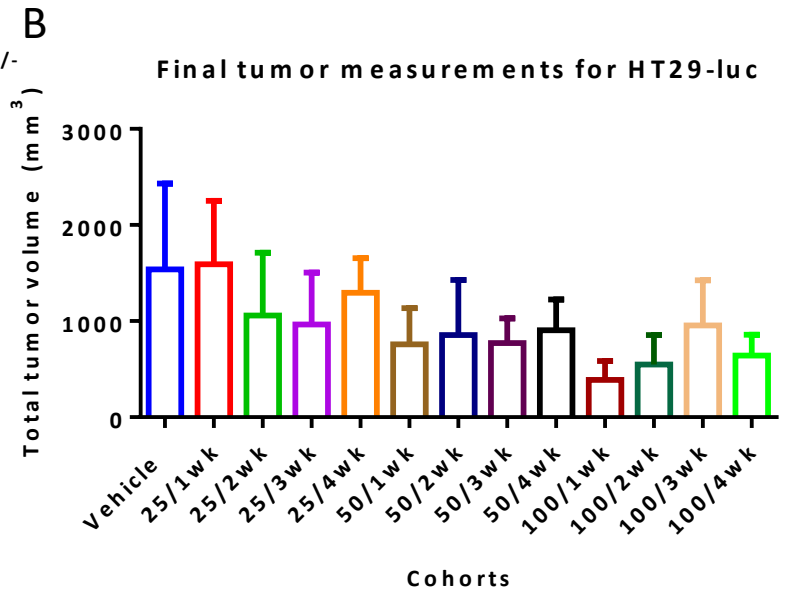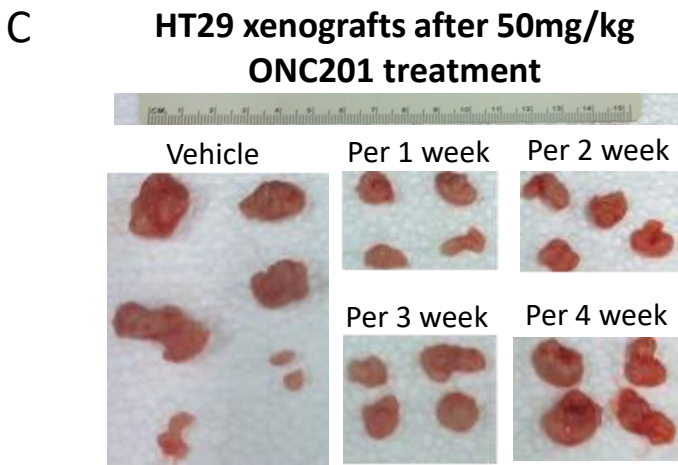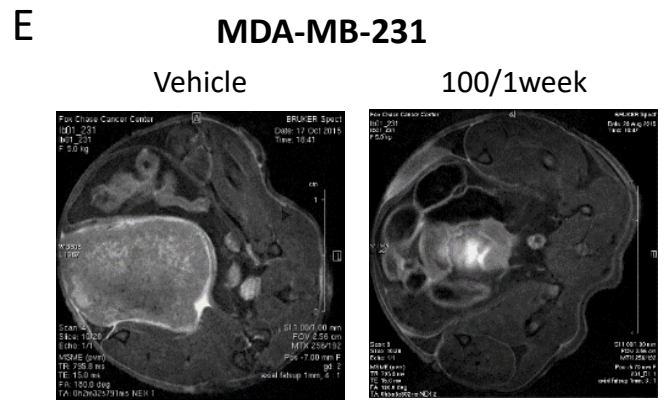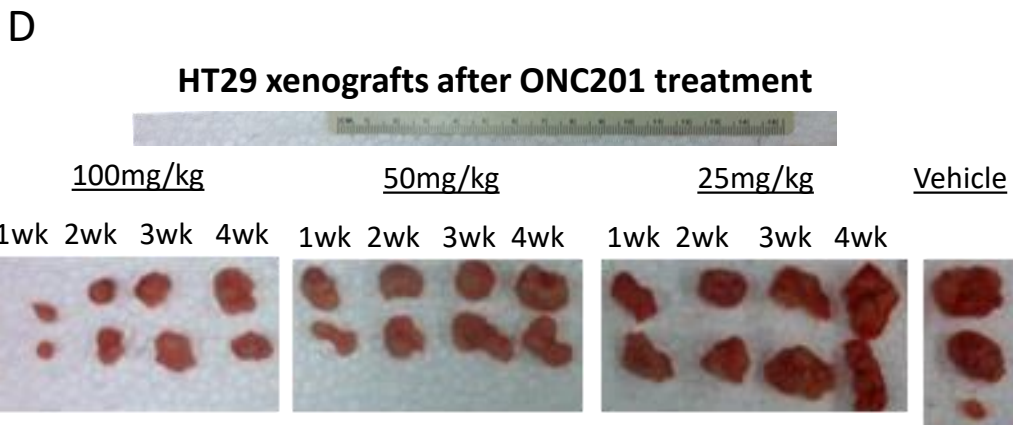



**A****Final tumor measurements for HT29-luc**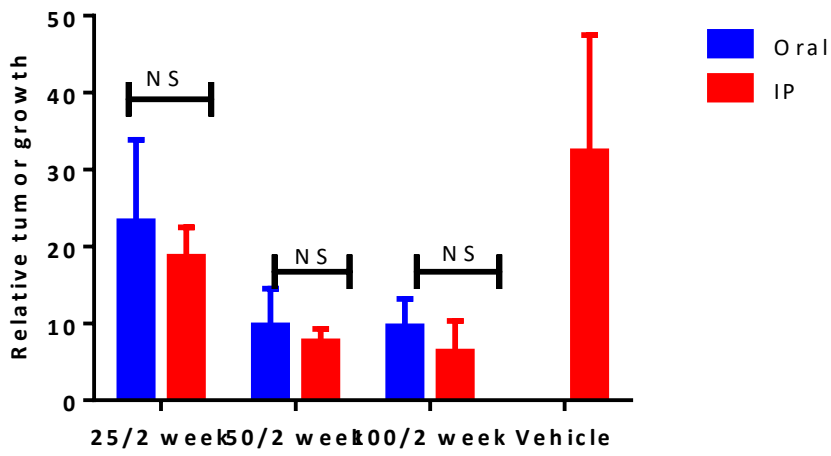**B****Weight of HT29 mice**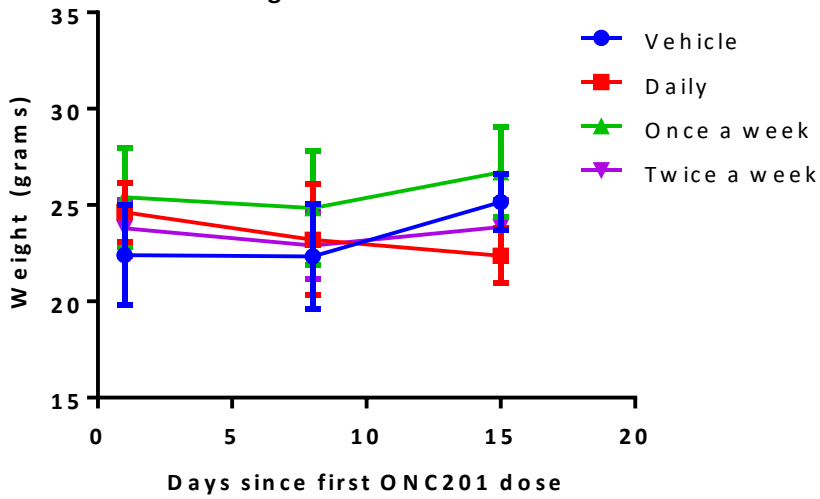**C****Final tumor growth  
HT29 xenografts**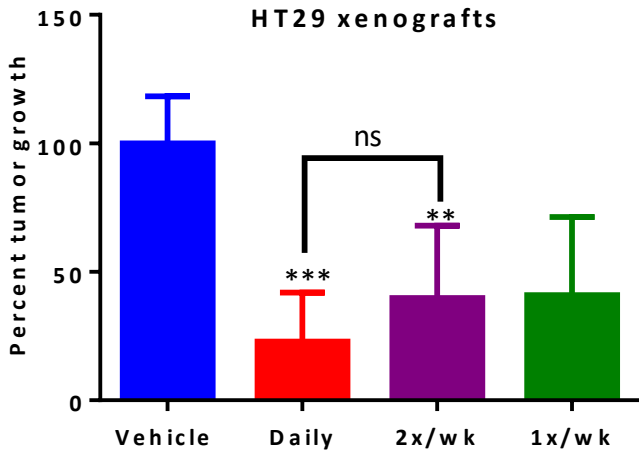

A

**HCT116 p53<sup>-/-</sup> xenografts after 6 weeks treatment**

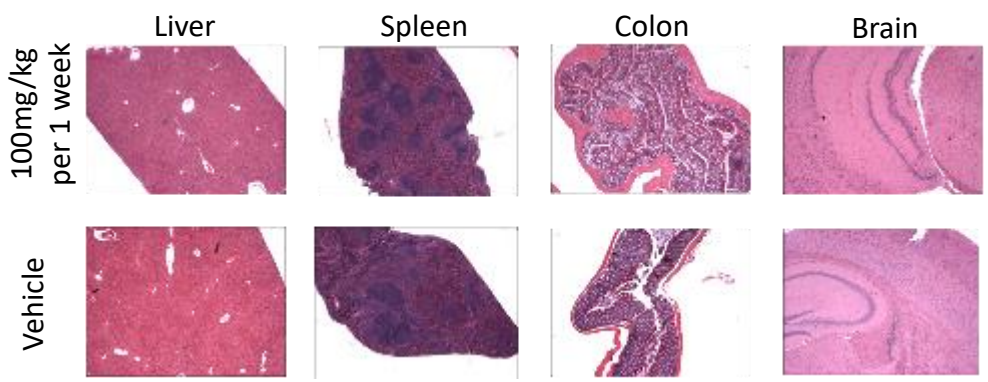

B

|              | Creatine     | Glucose      | Na+            | Cl-           | ALP           | ALT           | AST            | total bilirubin | Albumin      |
|--------------|--------------|--------------|----------------|---------------|---------------|---------------|----------------|-----------------|--------------|
| 25/1         | 1.57 +/- .6  | 212 +/- 4    | 107 +/- 13     | 116 +/- 4     | 38 +/- 7      | 120 +/- 5.6   | 286 +/- 3      | 2.8 +/- 3       | 2.6 +/- .15  |
| 25/2         | 1.4 +/- .78  | 286 +/- 25.1 | 129 +/- 13     | 115 +/- 4     | 41 +/- 12     | 88 +/- 25     | 277 +/- 15     | .4 +/- .2       | 2.6 +/- .1   |
| 50/1         | .25 +/- .05  | 166 +/- 6    | 123 +/- 8      | 112.5 +/- .5  | 38.5 +/- 10   | 54 +/- 15     | 210.5 +/- 4.5  | .3 +/- .05      | 2.35 +/- .05 |
| 50/2         | .35 +/- .05  | 199.5 +/- 24 | 108.5 +/- 12.5 | 88 +/- 29     | 51 +/- 4      | 98 +/- 6      | 334.5 +/- 22.5 | .2 +/- .2       | 2.65 +/- .15 |
| 100/1        | 1.45 +/- .25 | 205 +/- 33   | 129.5 +/- 18.5 | 116.5 +/- 3.5 | 41.2 +/- 1.25 | 88 +/- 3      | 217 +/- 17     | .4 +/- .1       | 2.65 +/- .25 |
| 100/2        | 1.6 +/- .4   | 144 +/- 28   | 141.5 +/- 6.5  | 115 +/- 1     | 66.6 +/- 25.4 | 53 +/- 18     | 280.5 +/- 46.5 | .6 +/- .2       | 2.7 +/- .3   |
| vehicle      | 0.67 +/- .46 | 225 +/- 68   | 125 +/- 11     | 110 +/- 4     | 48 +/- 9      | 97.5 +/- 25.5 | 236 +/- 54     | .47 +/- .3      | 2.6 +/- .08  |
| normal range | .2-.9        | 125-222      | 140-160        | 110-118       | 75-111        | 17-77         | 54-298         | 0-.9            | 2.5-3.2      |

SLIGHT HEMOLYSIS

slight below

slight above

Within normal range

C

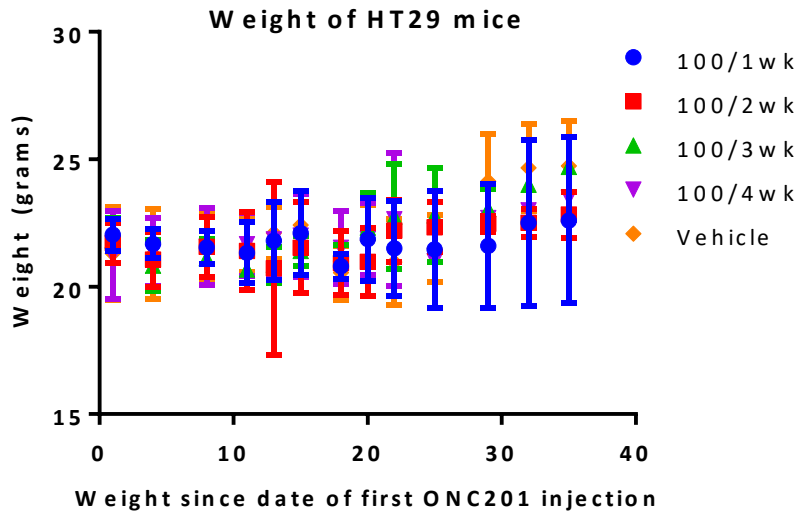

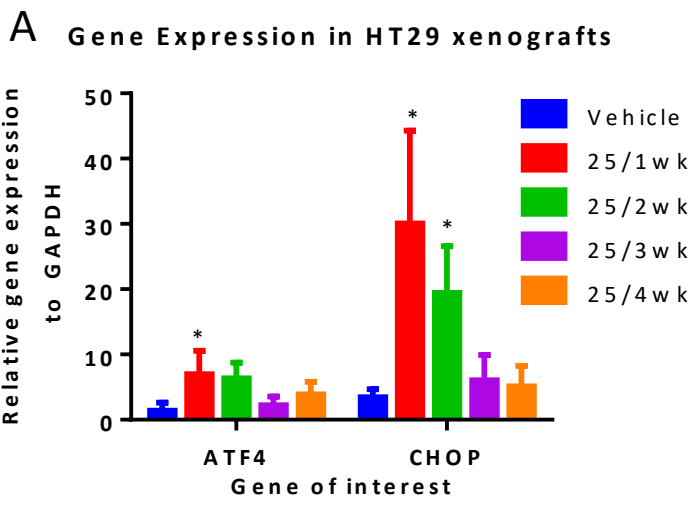

Gene Expression in HT29 xenografts due to monthly dosage

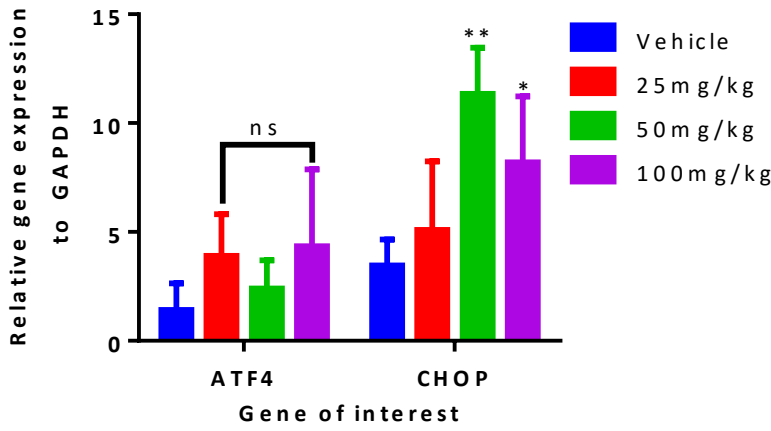

**B**

|                | Abs Value | Conc (pg/mL) |
|----------------|-----------|--------------|
| Positive Serum | 0.195     | 91.2         |
| Negative Serum | 0.0739    | 21.6         |
| Blank          | 0.009     | 0.08         |

TRAIL ELISA STANDARD CURVE

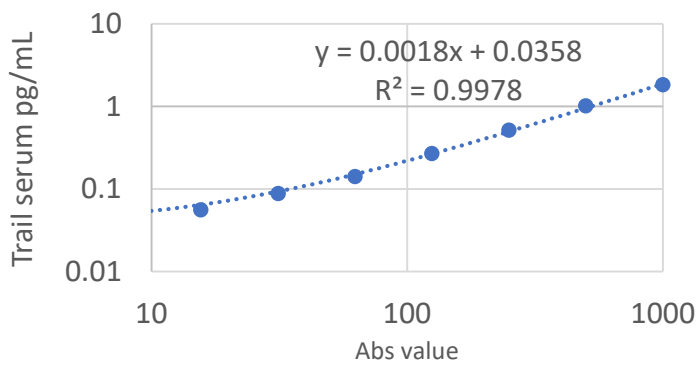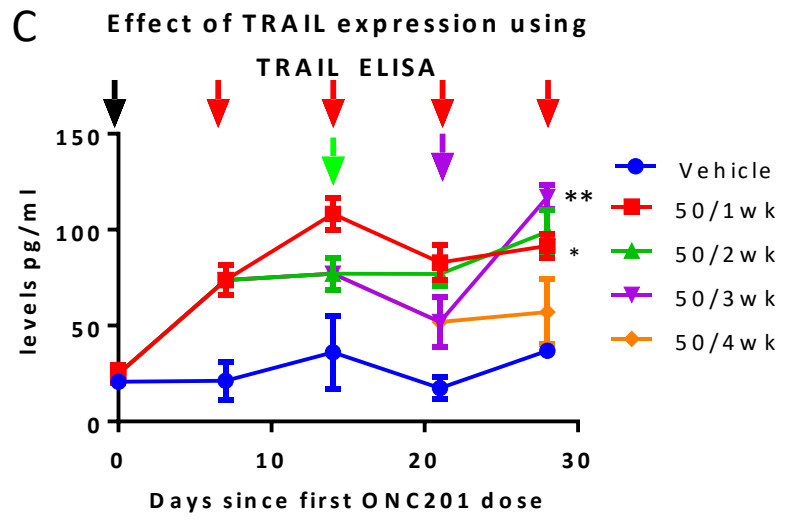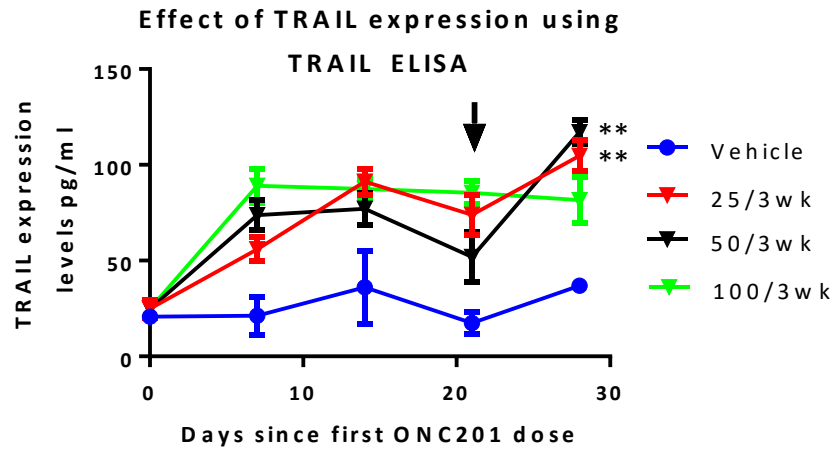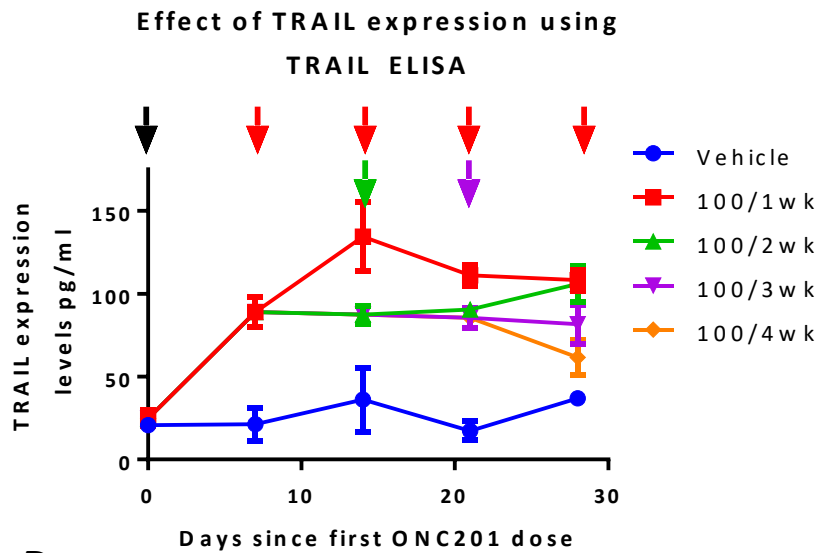

**D**

HCT116 p53-null xenografts

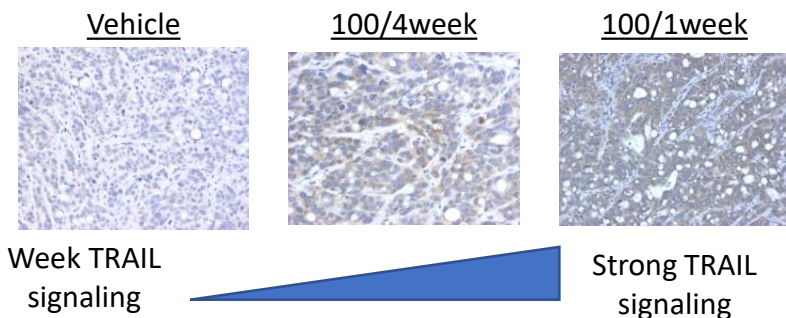

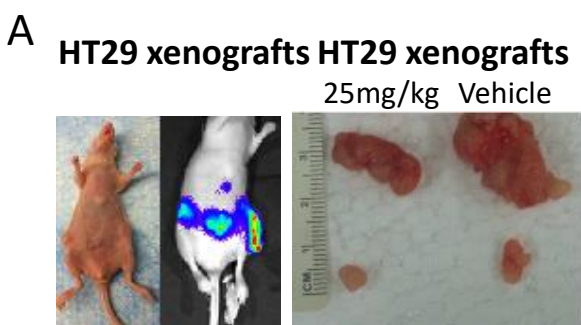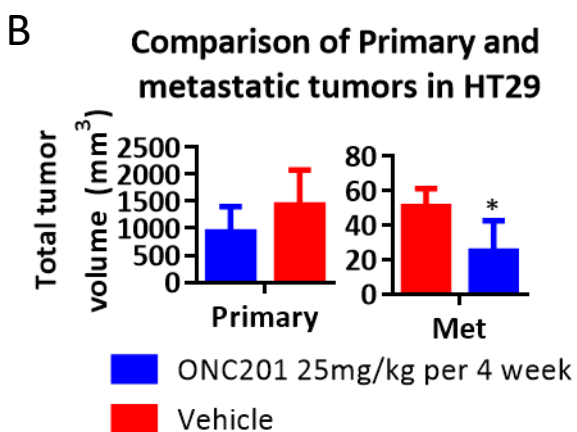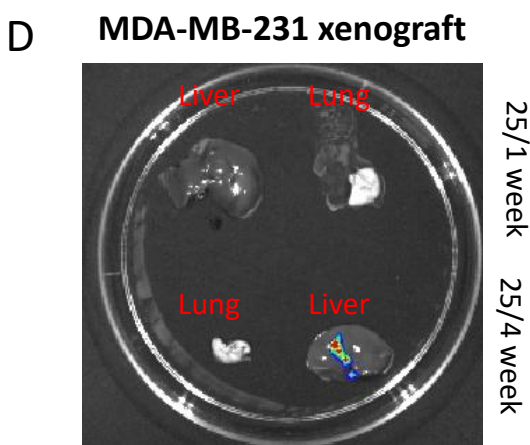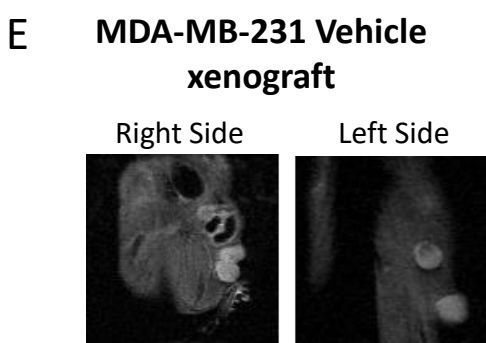

**C**

| Cohort    | Subcutaneous location |                               | Internal location (pathology) |
|-----------|-----------------------|-------------------------------|-------------------------------|
|           | Number                | Size Range (mm <sup>3</sup> ) |                               |
| Vehicle   | 8                     | 18-40.5                       | liver-bt, lung-sp             |
| 25/1week  | 6                     | lung-sp                       | liver-sp                      |
| 25/2week  | 2                     | sp-18                         | liver-sp                      |
| 25/3week  | 1                     | sp-18                         | liver/lung-sp                 |
| 25/4week  | 5                     | 18-32                         | liver/lung-sp                 |
| 50/1week  | 0                     |                               |                               |
| 50/2week  | 0                     |                               | lung-sp                       |
| 50/3week  | 0                     |                               | lung-sp                       |
| 50/4week  | 1                     | 13.9                          |                               |
| 100/1week | 0                     |                               |                               |
| 100/2week | 0                     |                               |                               |
| 100/3week | 0                     |                               |                               |
| 100/4week | 1                     | 11.5                          |                               |

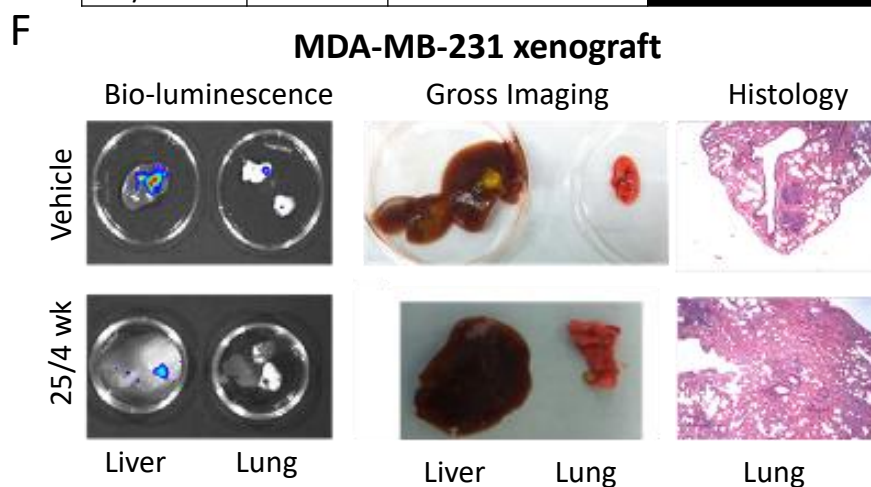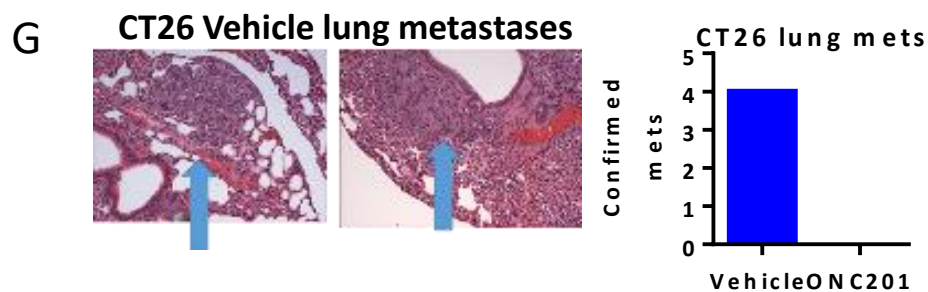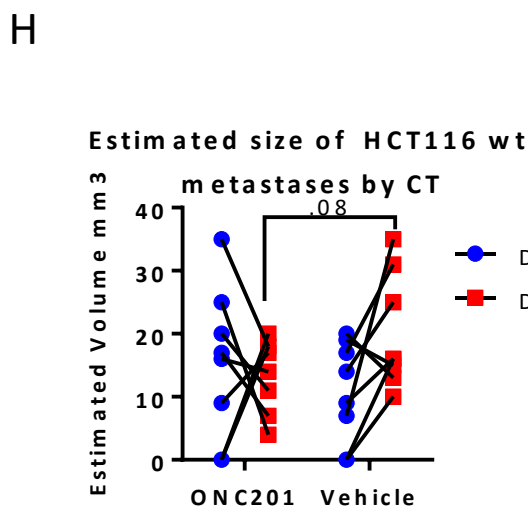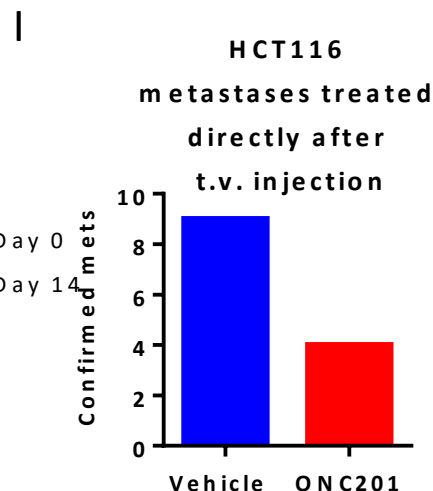

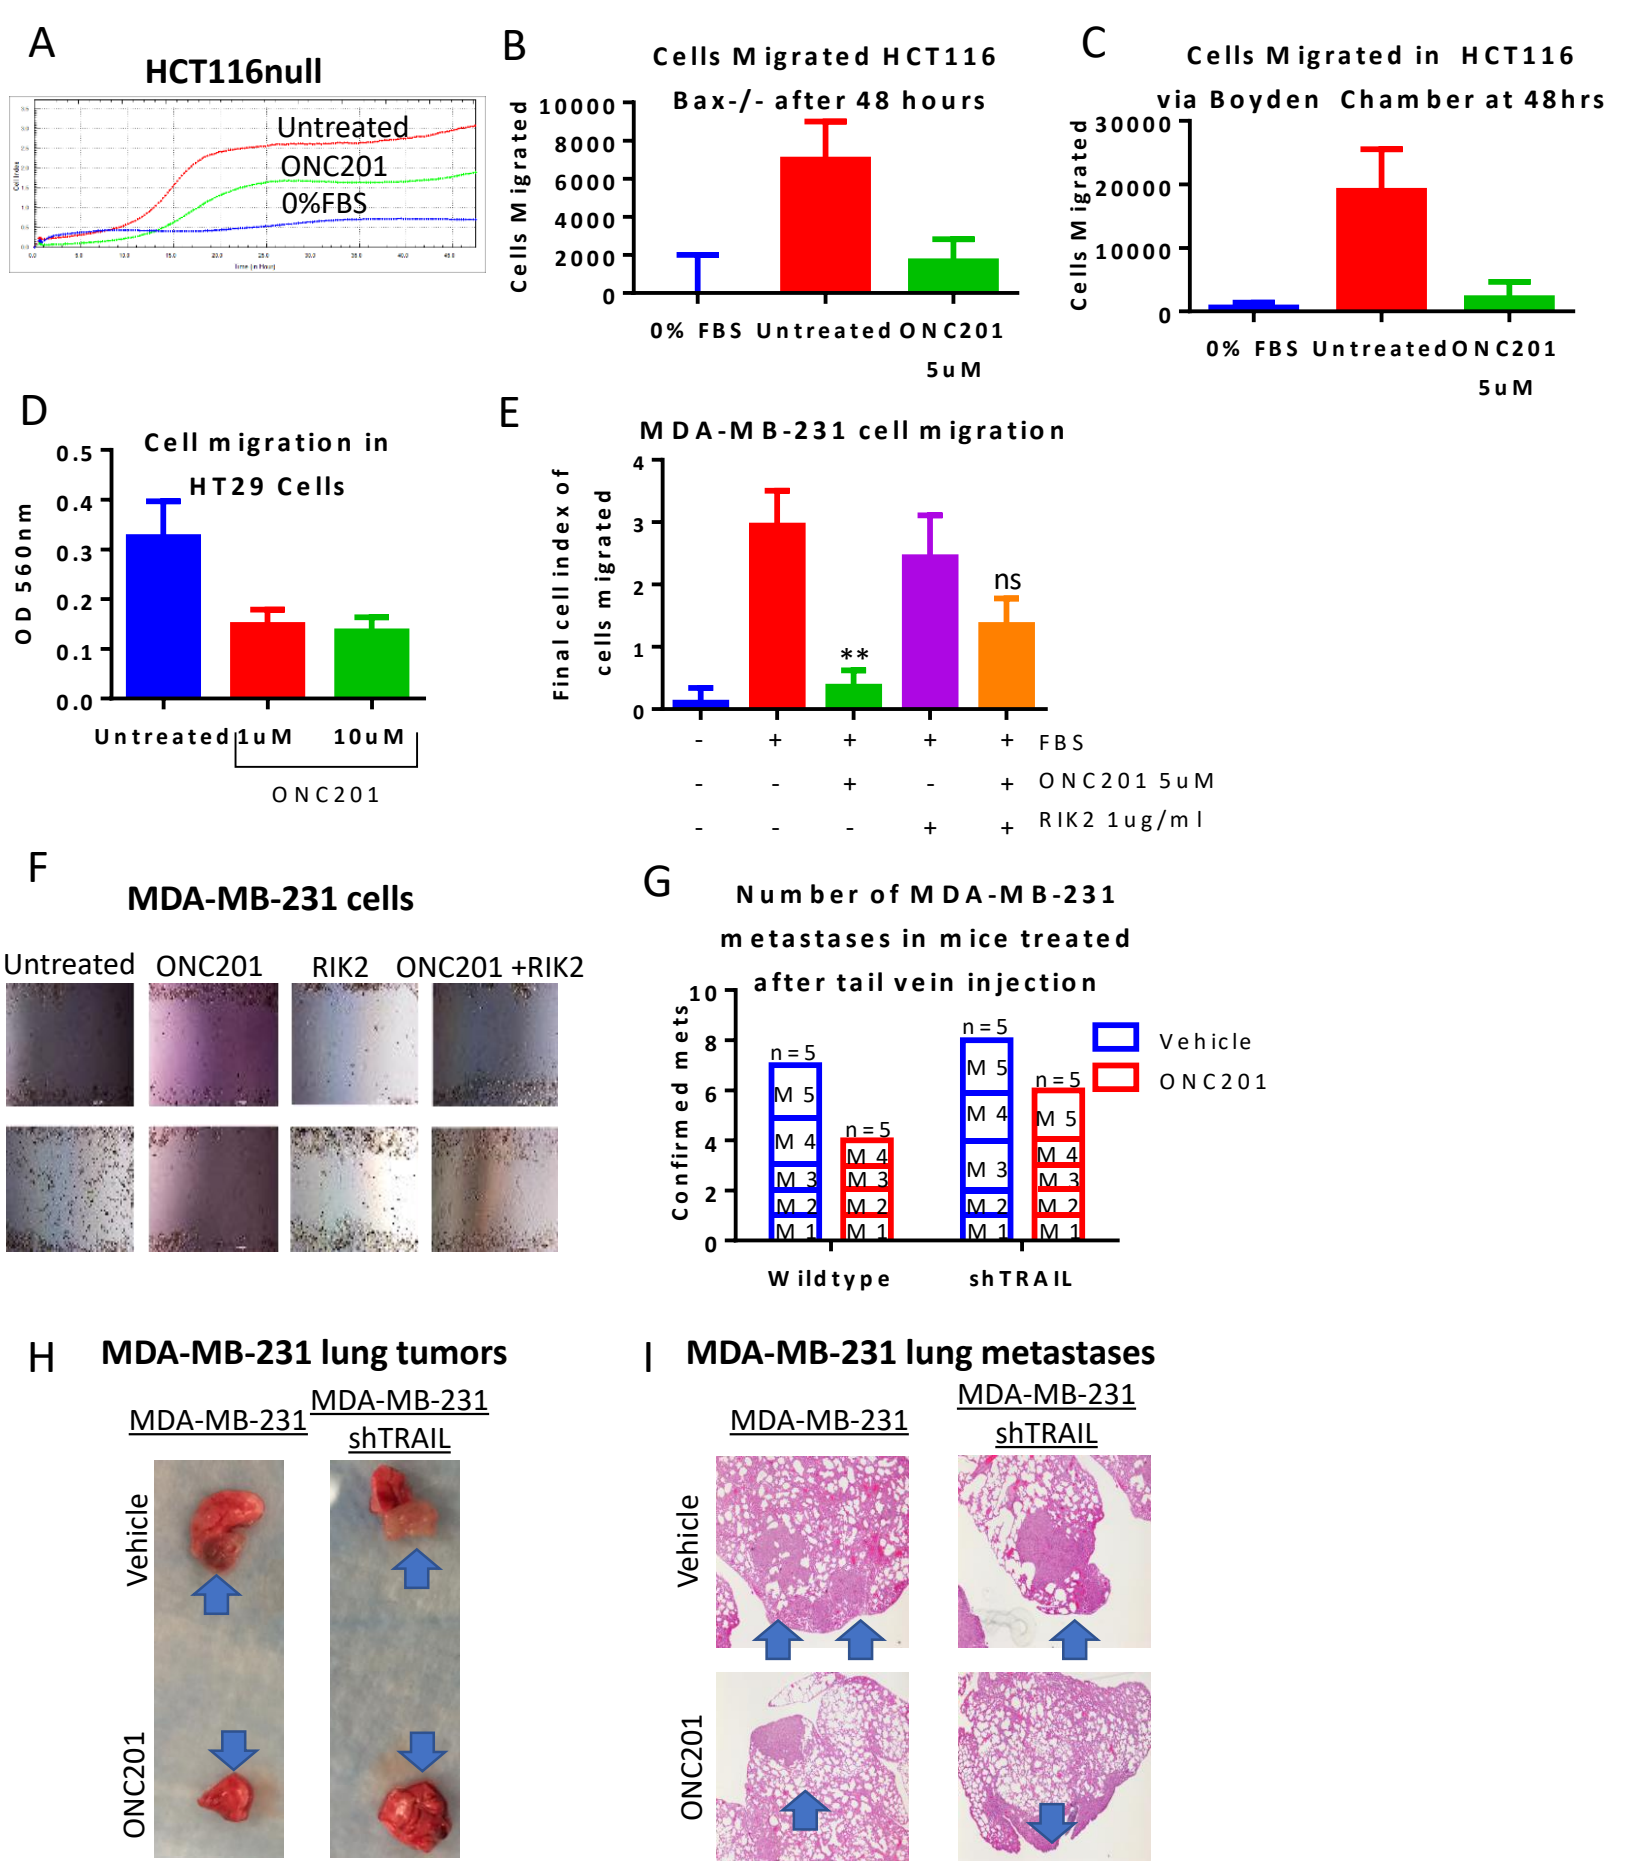



# Analysis of NK and T Cells

**A**

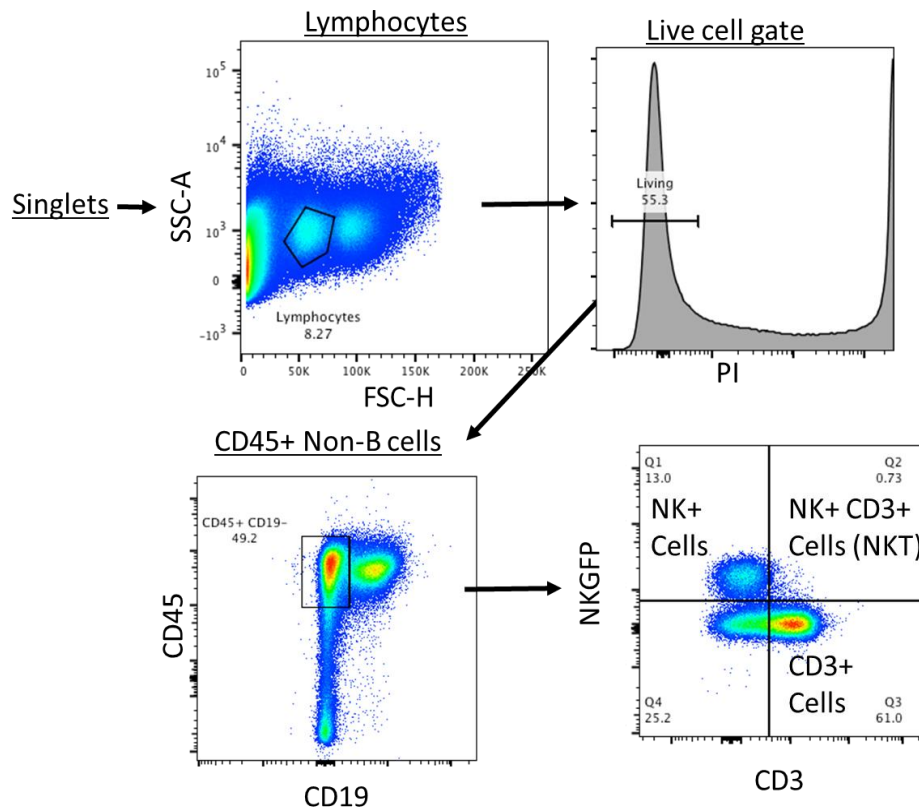

## Activated NK cells

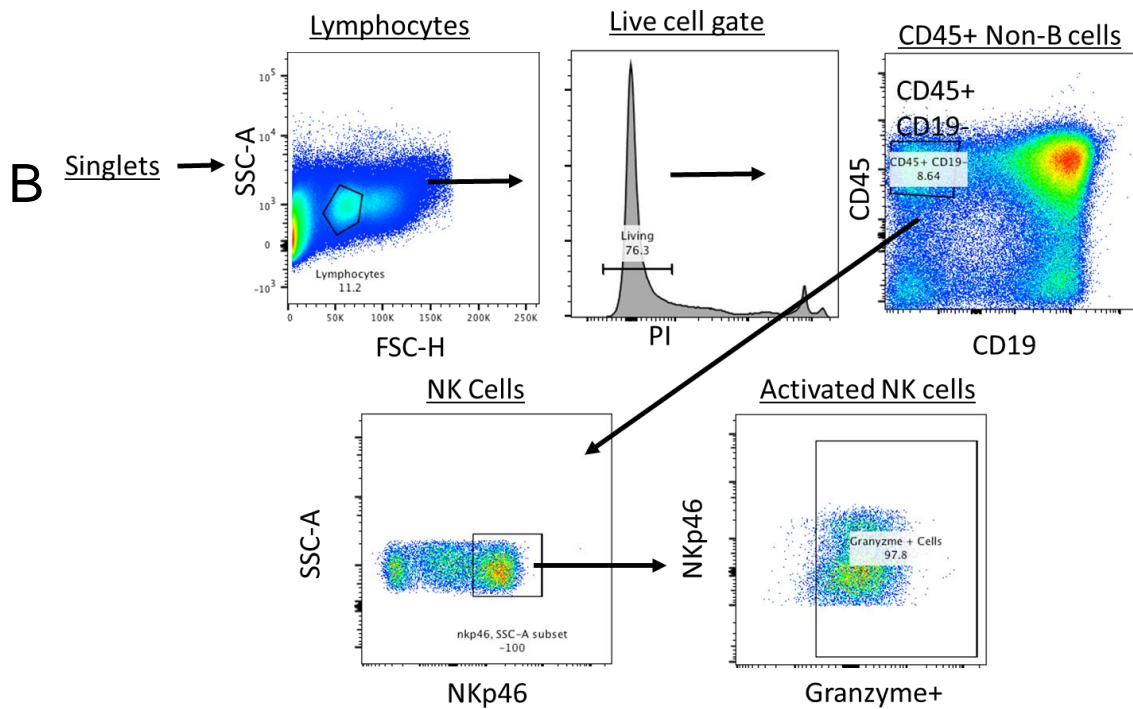

Gate was determined by looking at CD45+ CD19+ (B-cells)

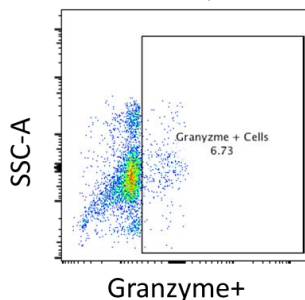

**A****T-Cell Differentiation**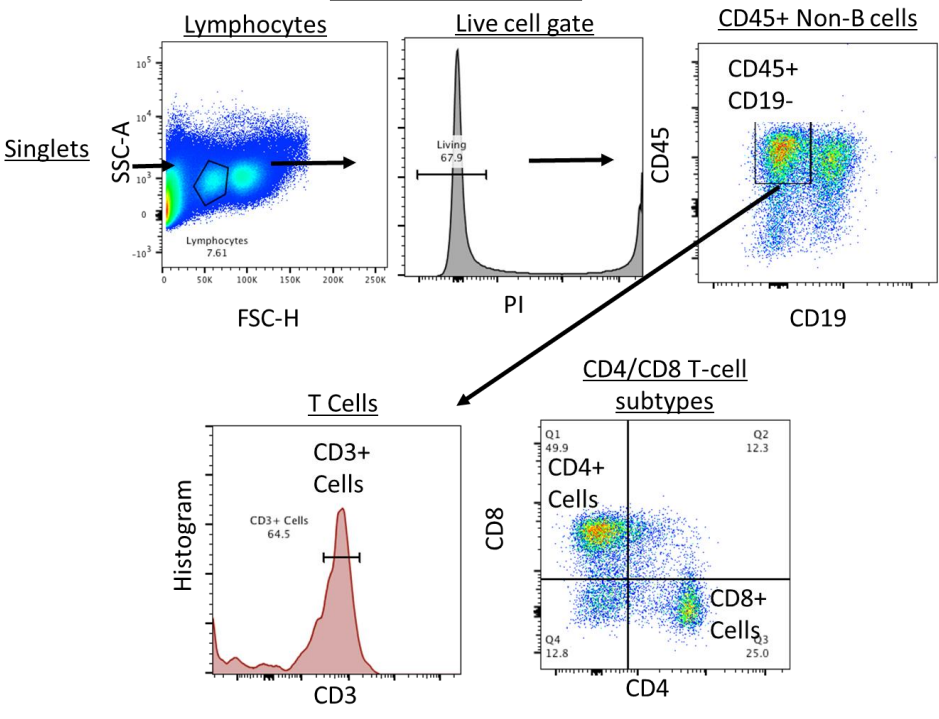**B****PD-1 expression**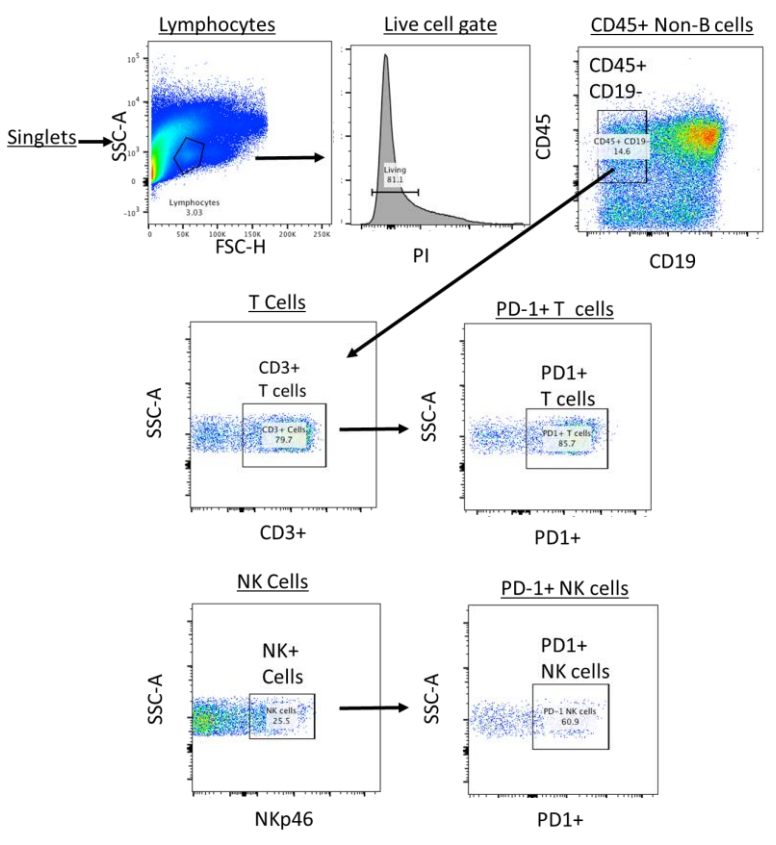

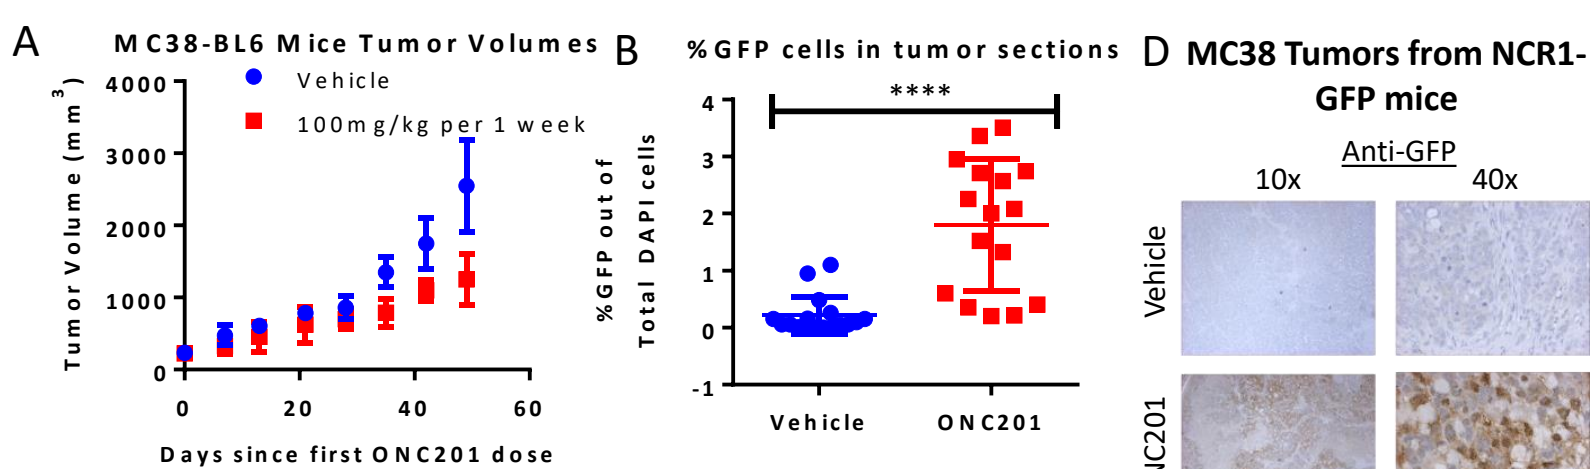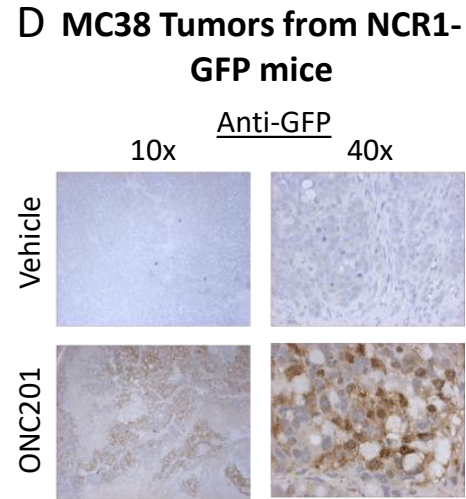

**C** MC38 Xenografts

|                 | Vehicle        | ONC201         | P value |
|-----------------|----------------|----------------|---------|
| % Lymphocytes   | .86 +/- 0.52   | 12.58 +/- 6.97 | 0.036   |
| %CD11b+/Ly6C+   | 0.002 +/- .003 | .095 +/- .005  | ns      |
| %CD11b/Ly6G+    | .014 +/- .02   | .231 +/- .032  | 0.03    |
| %NK Cells       | 1.94 +/- 1.99  | 10.99 +/- 7.95 | 0.055   |
| % CD3+ Cells    | 7.26 +/- 10.18 | 40.5 +/- 8.85  | 0.005   |
| CD4+/CD3+ Cells | 7.31 +/- 5.16  | 54.28 +/- 7.48 | 0.004   |
| CD8+/CD3+ Cells | 5.56 +/- 3.88  | 35.68 +/- 5.99 | 0.004   |

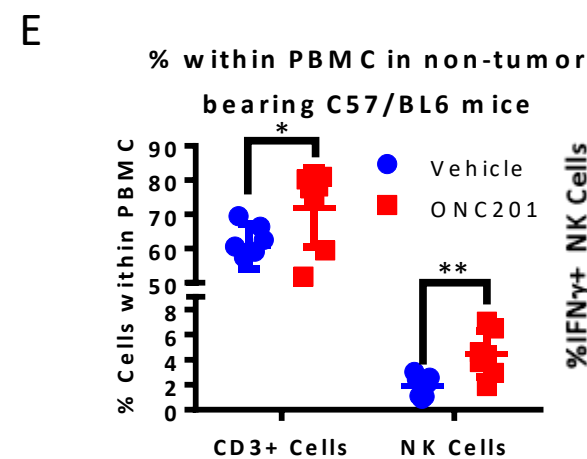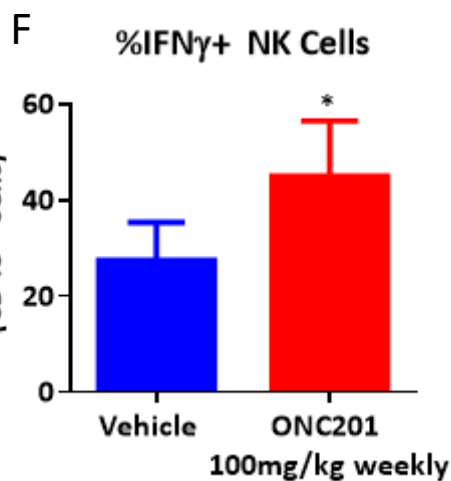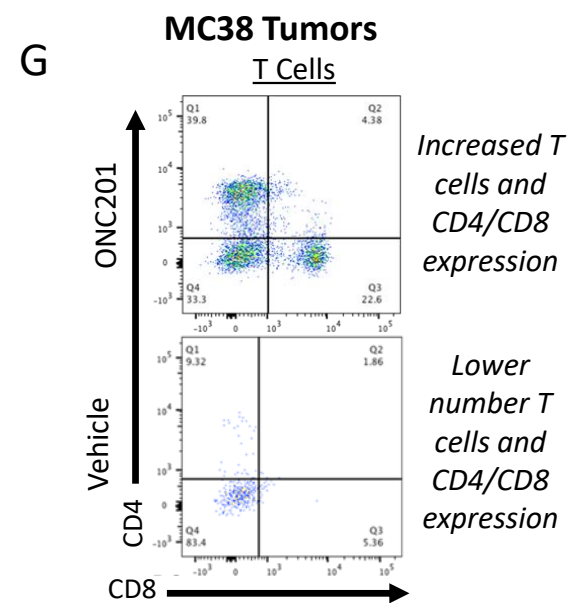



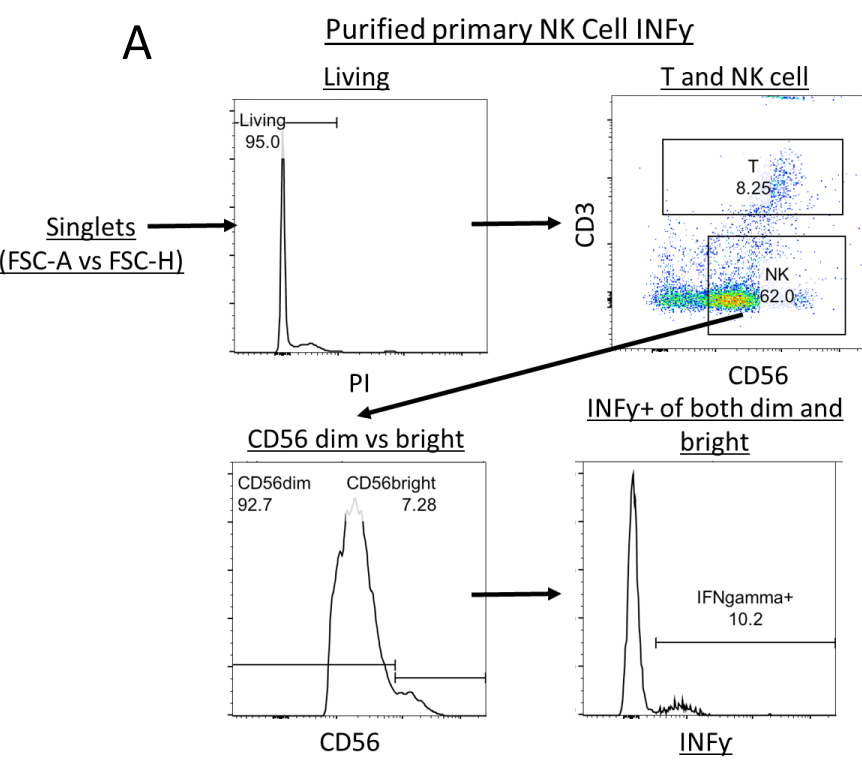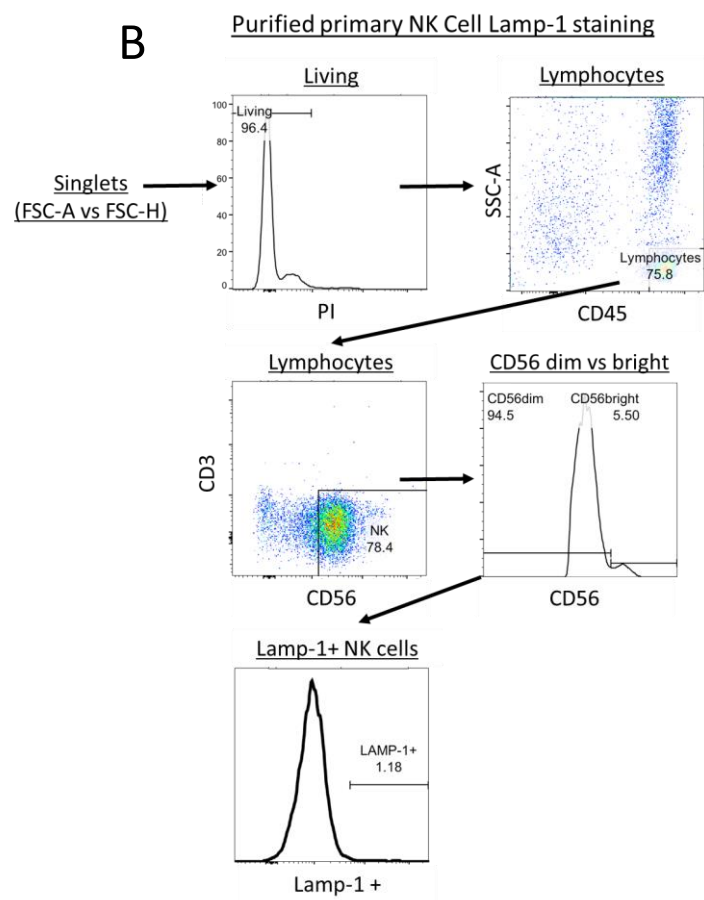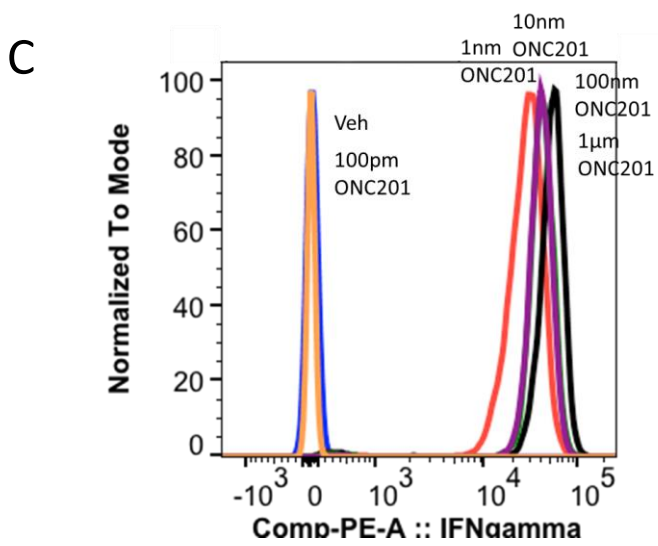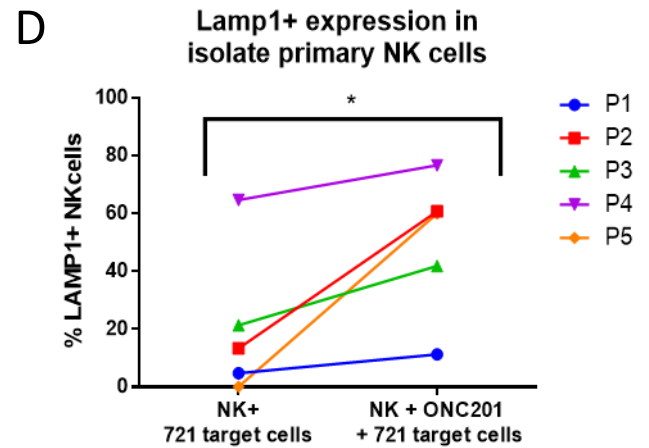

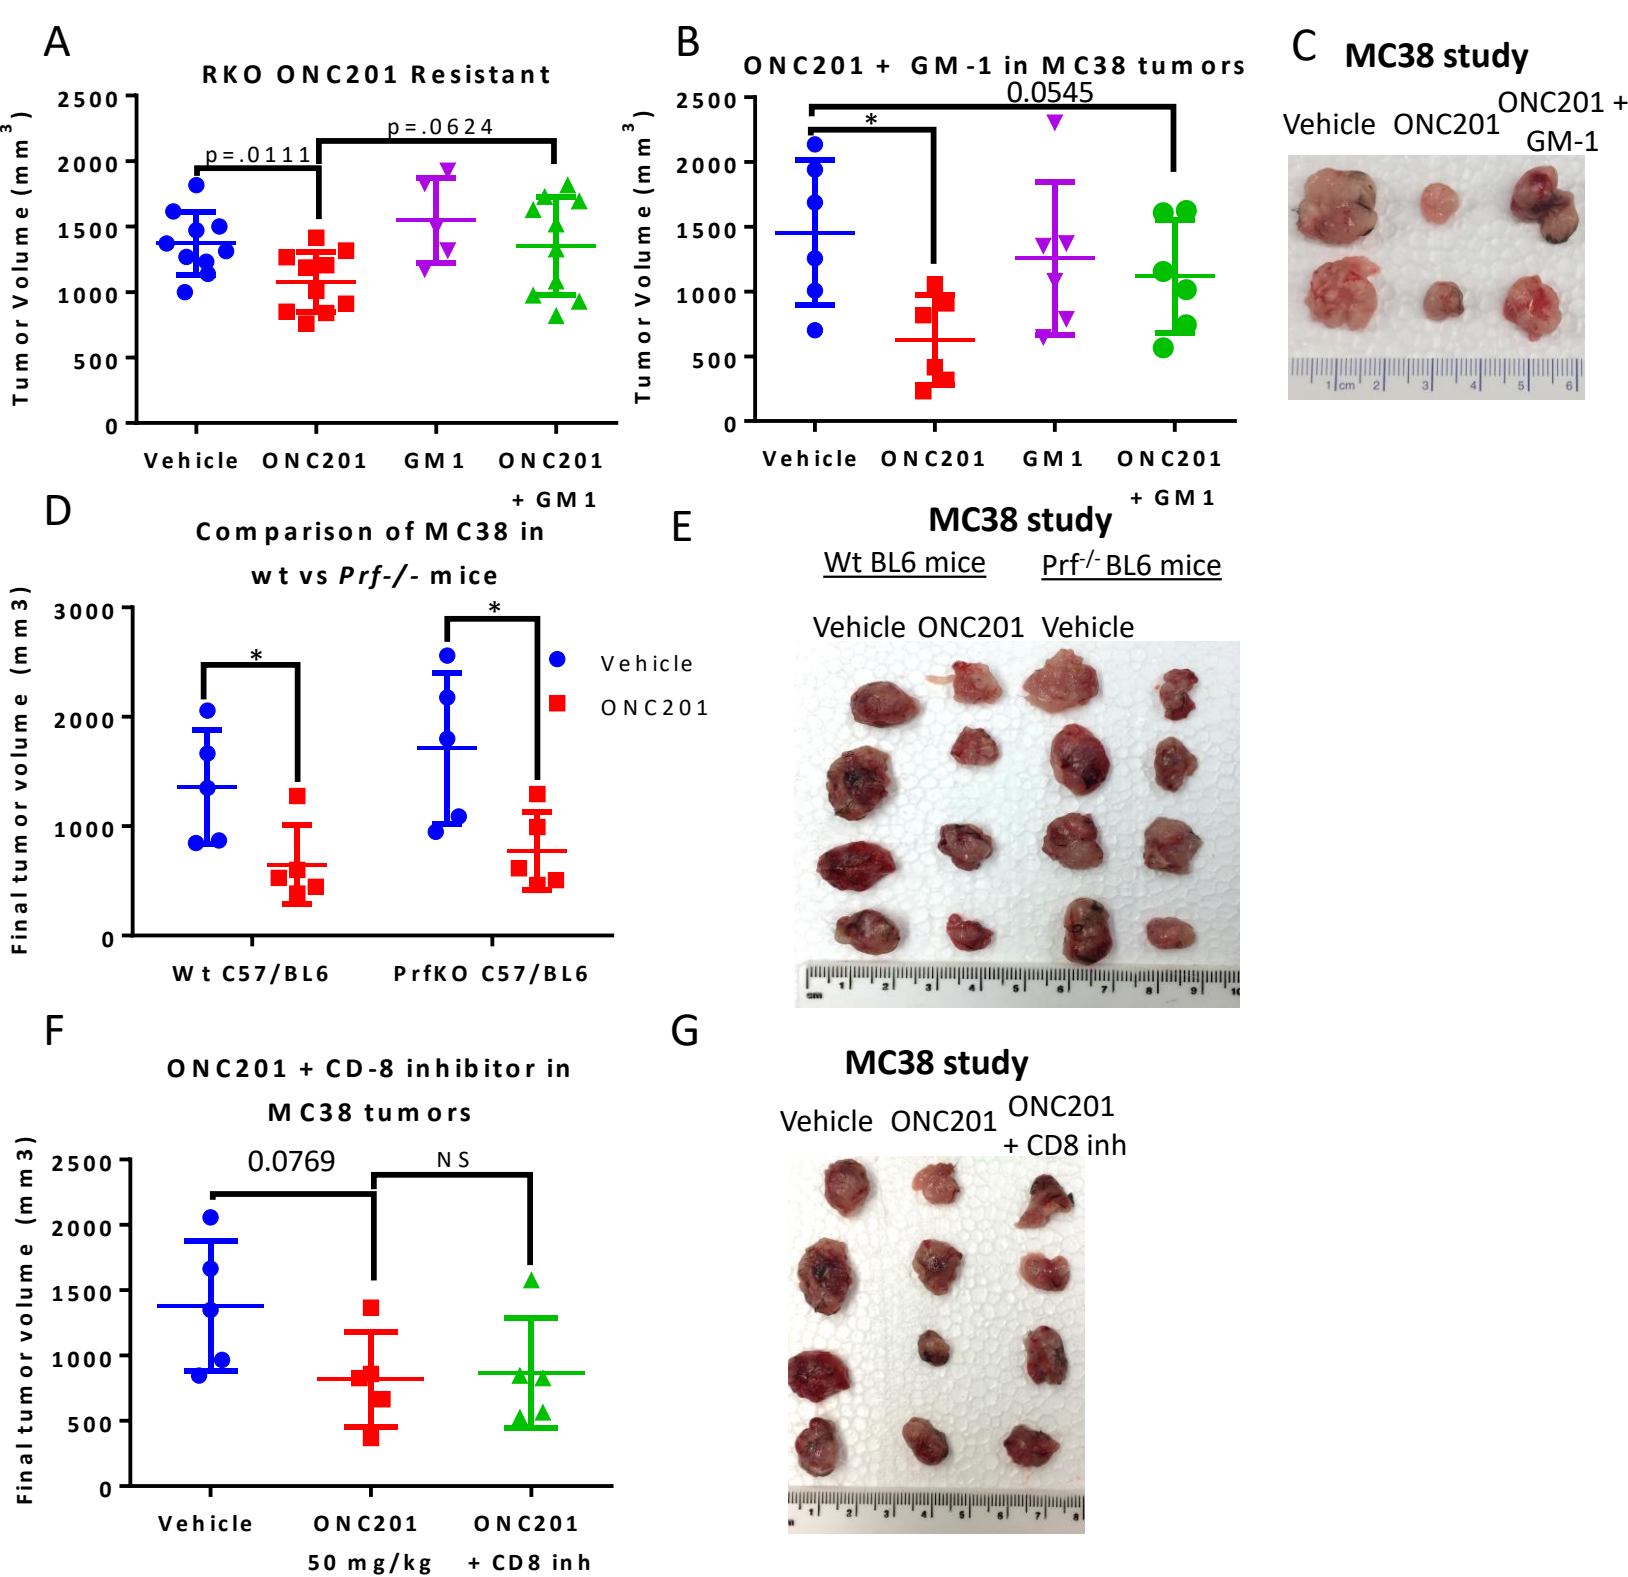

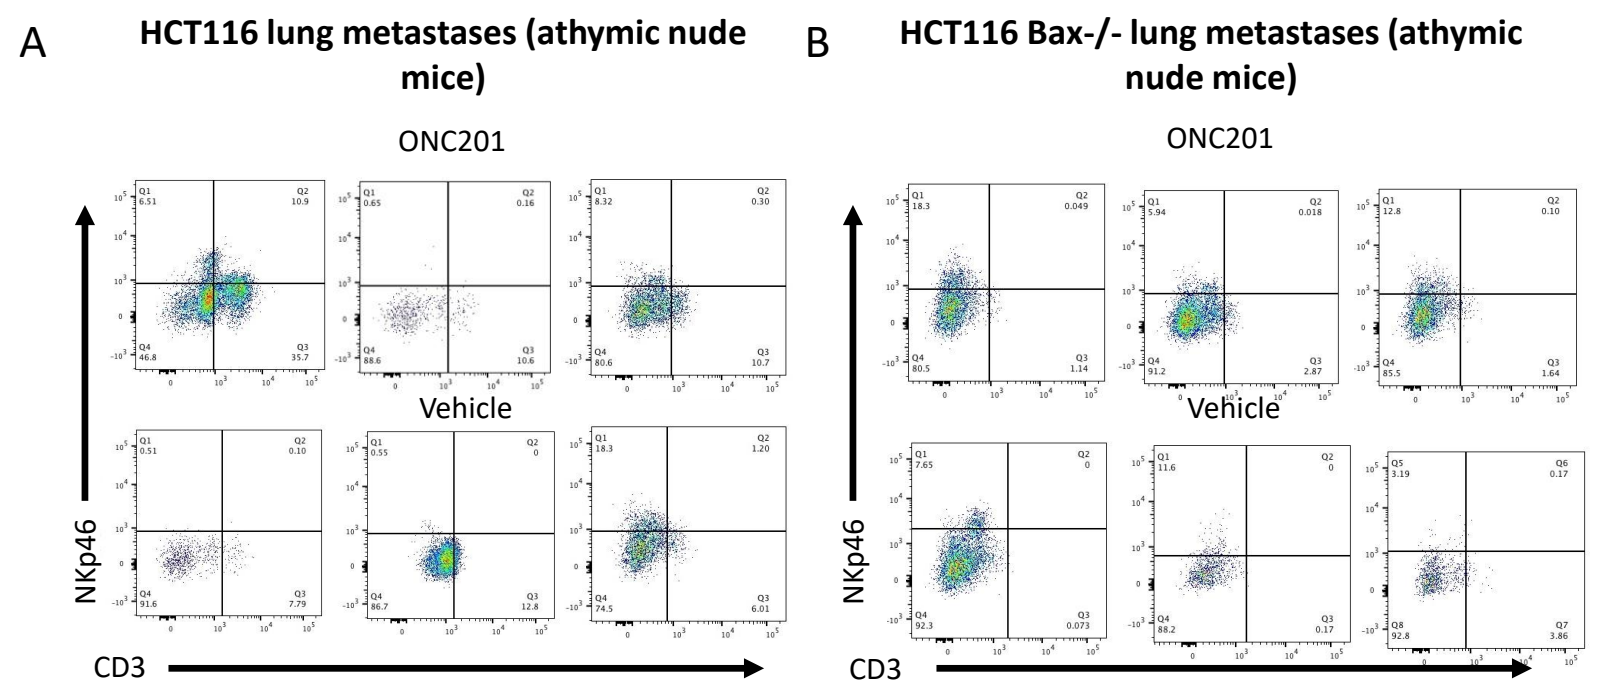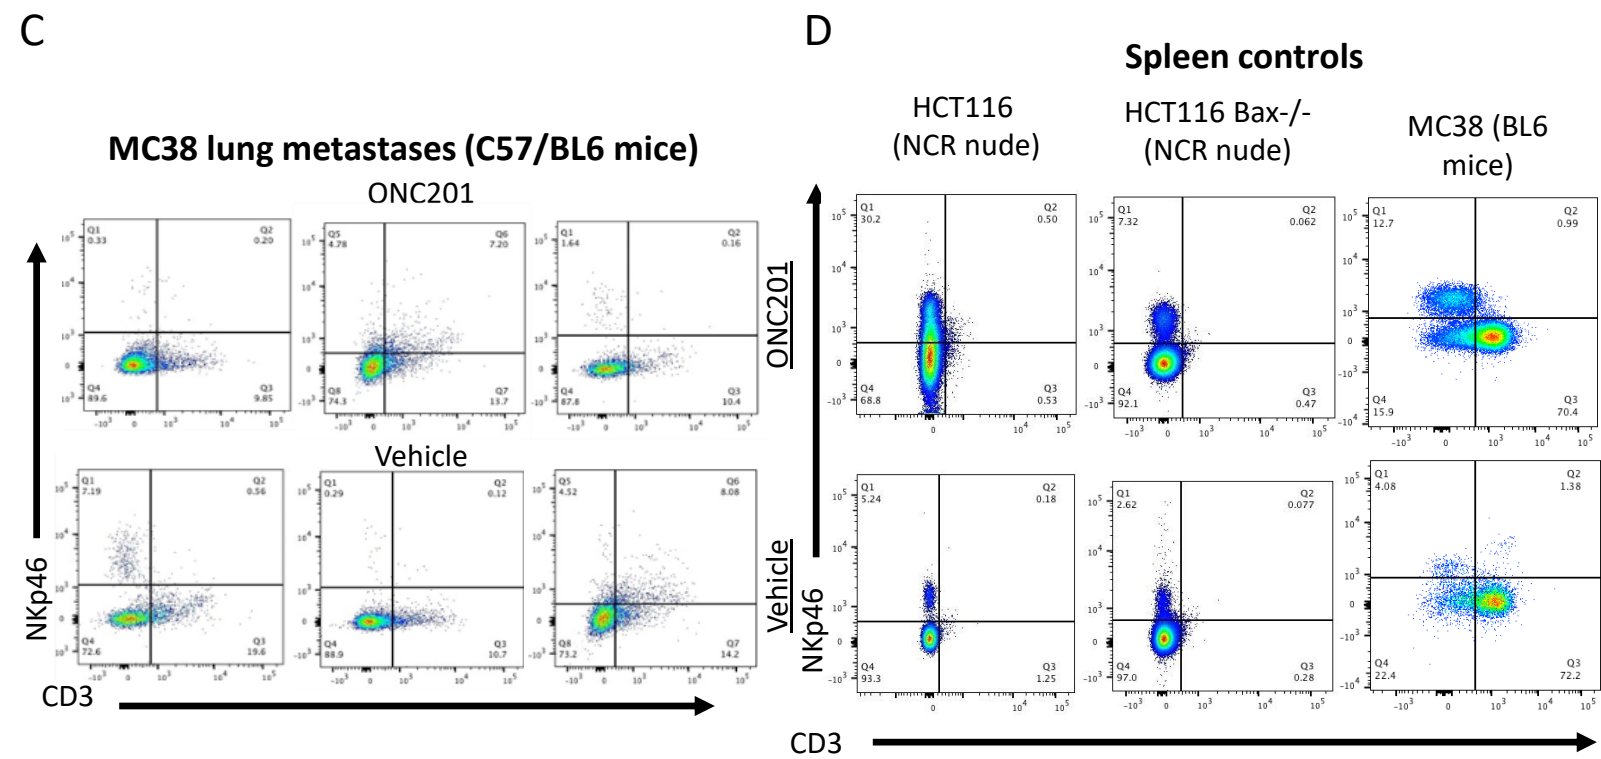

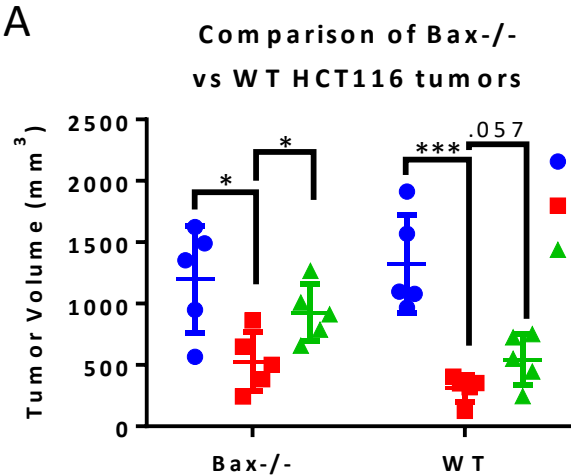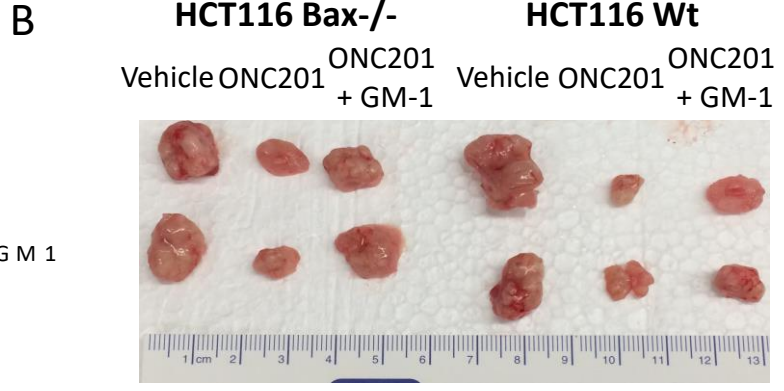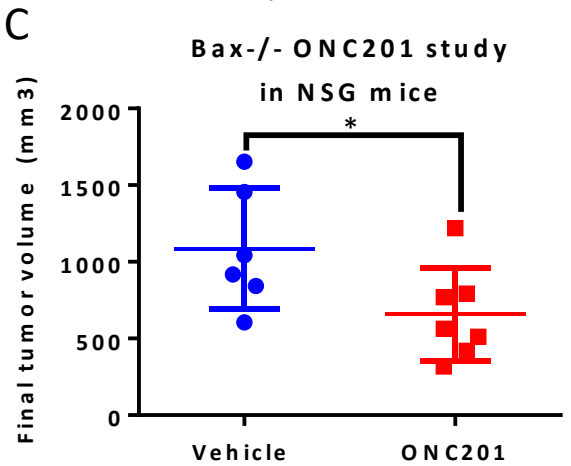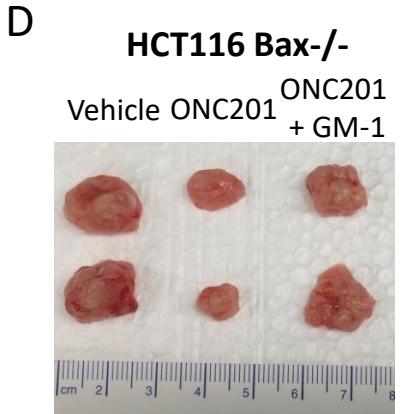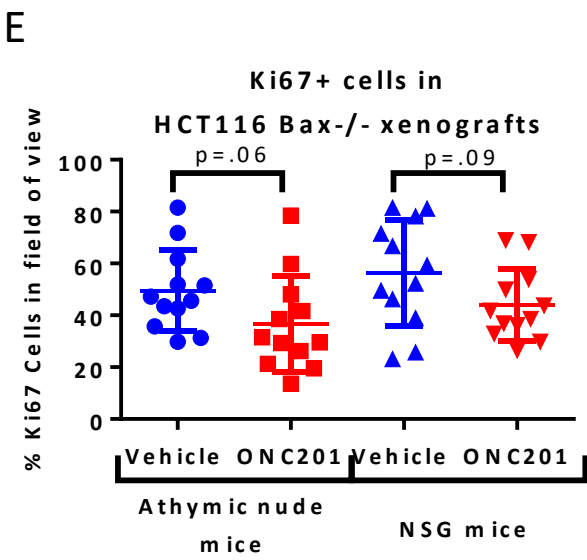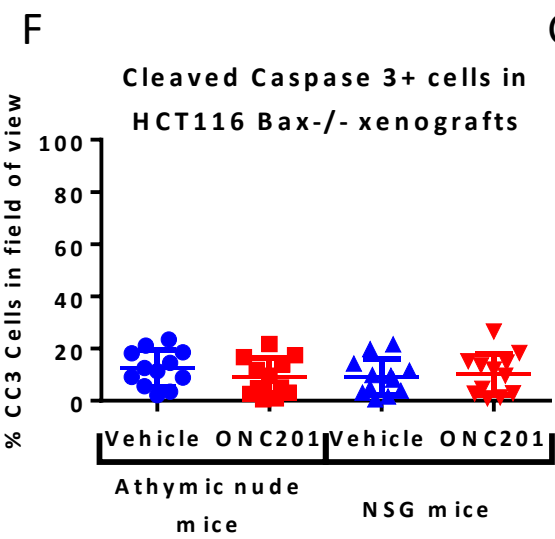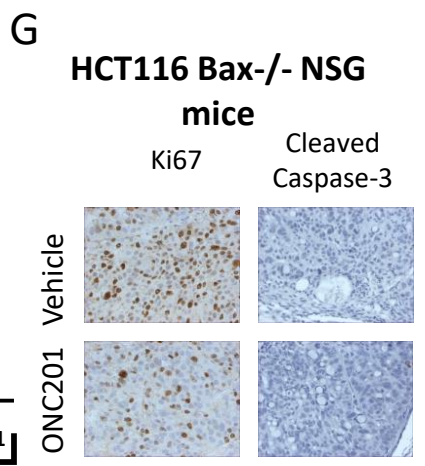

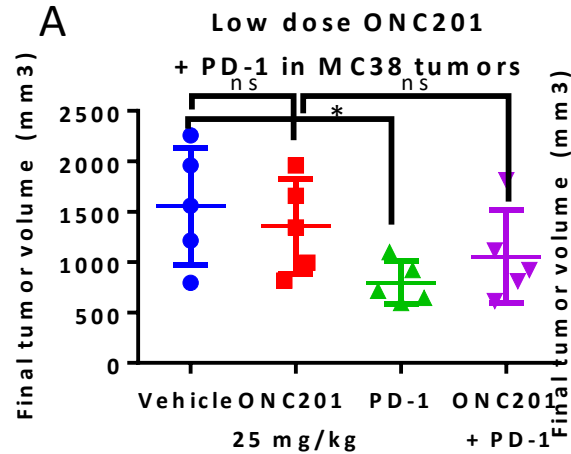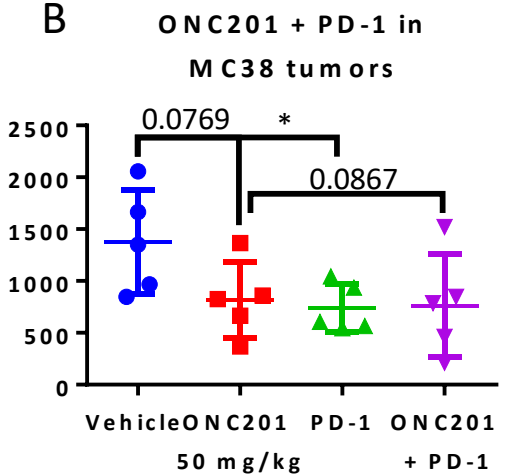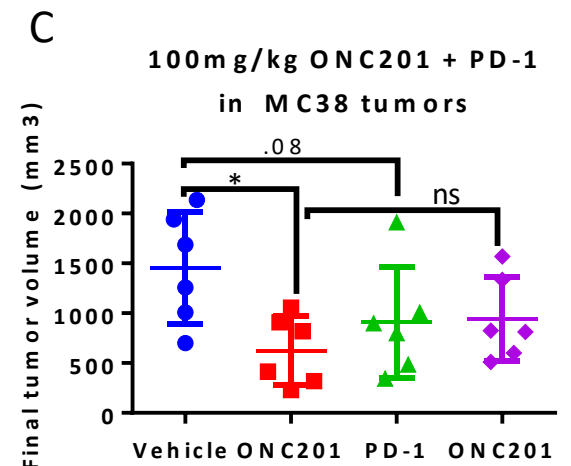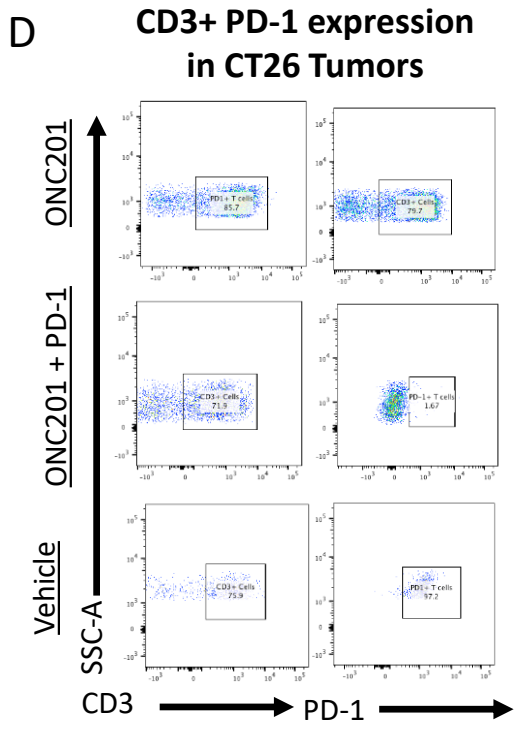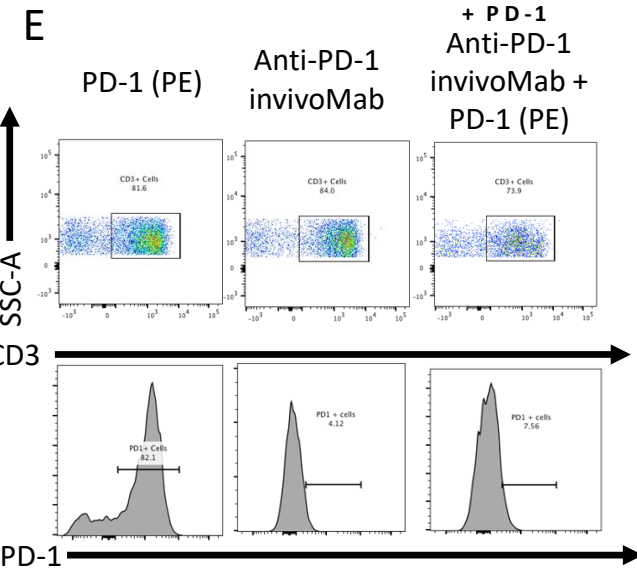

Wagner et al., Figure S14

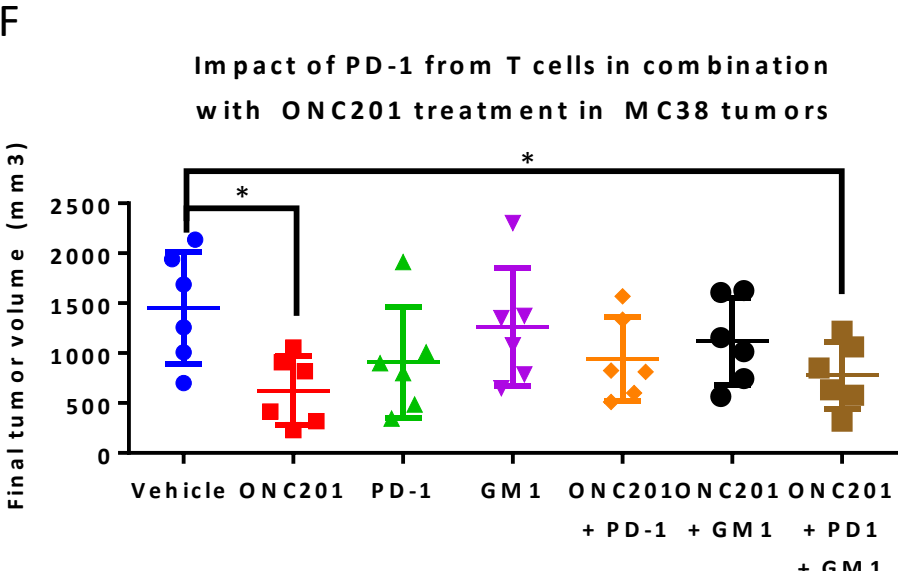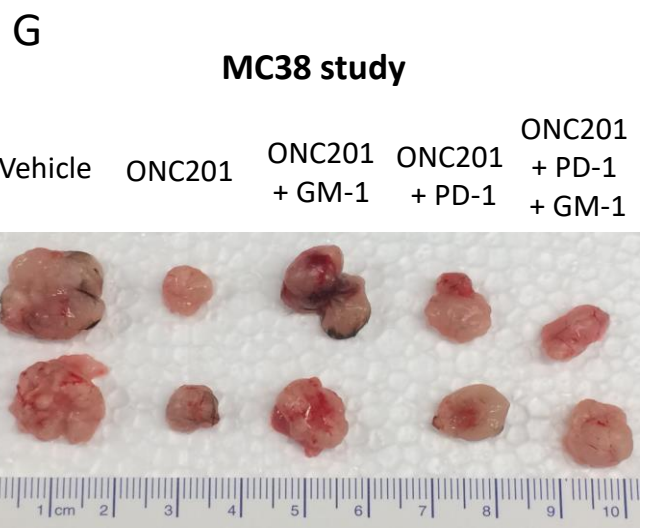

**Tumor conditioned media results from ELISA Multiplex**

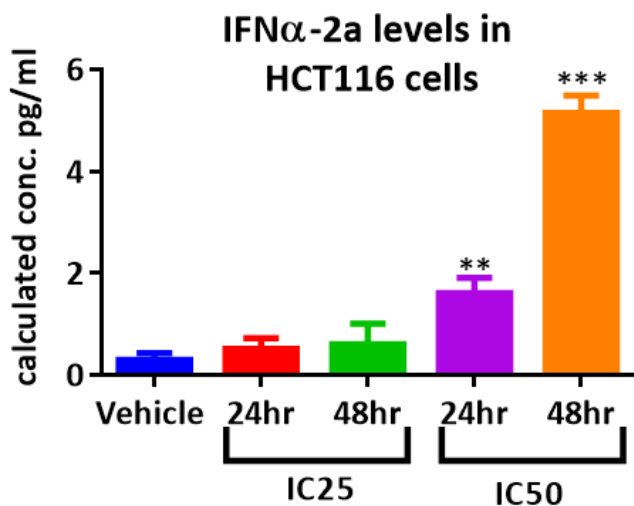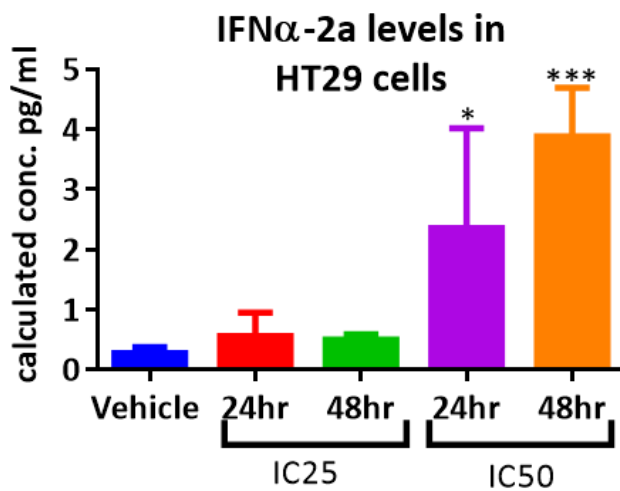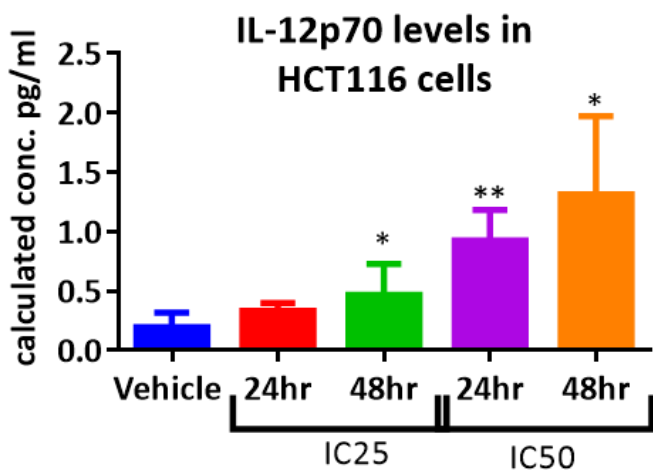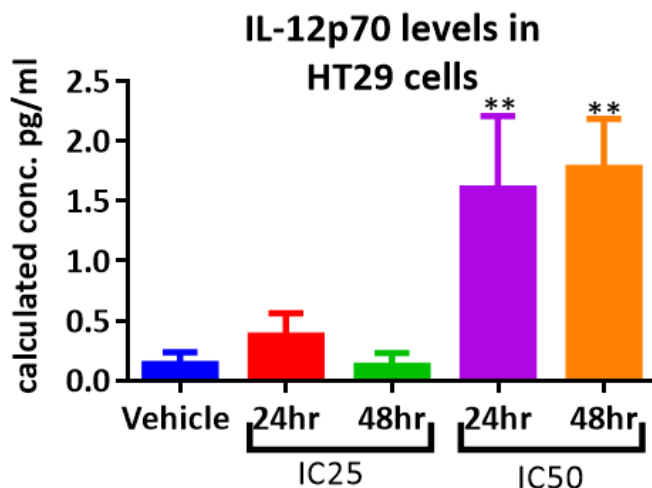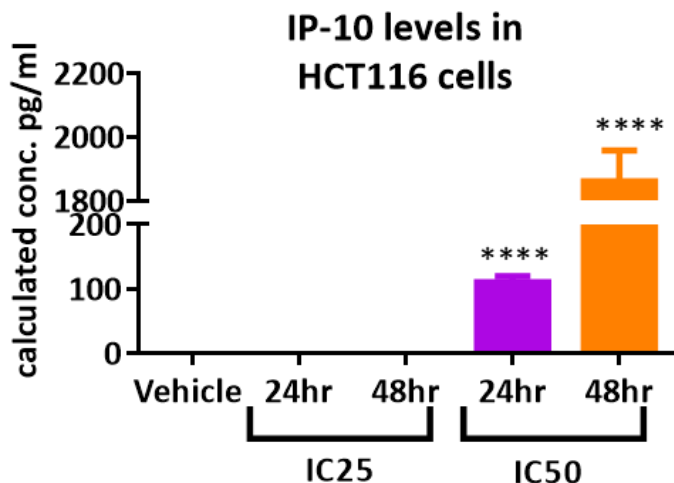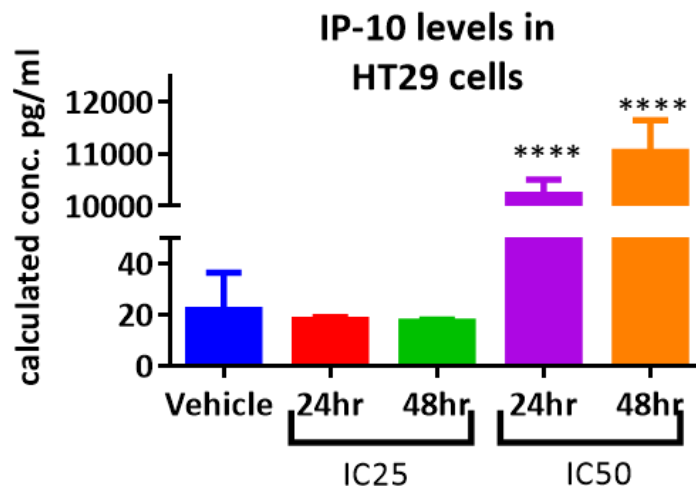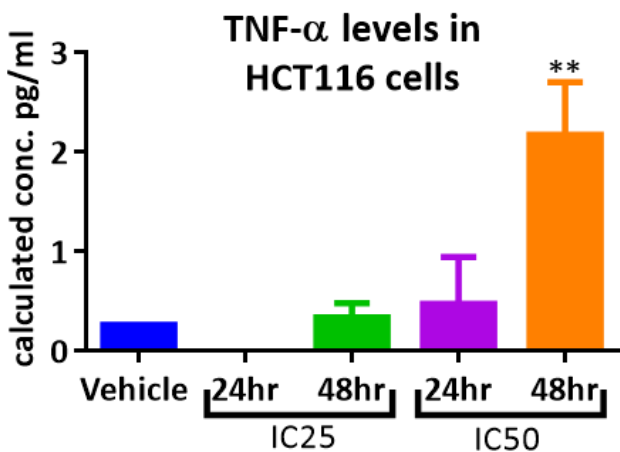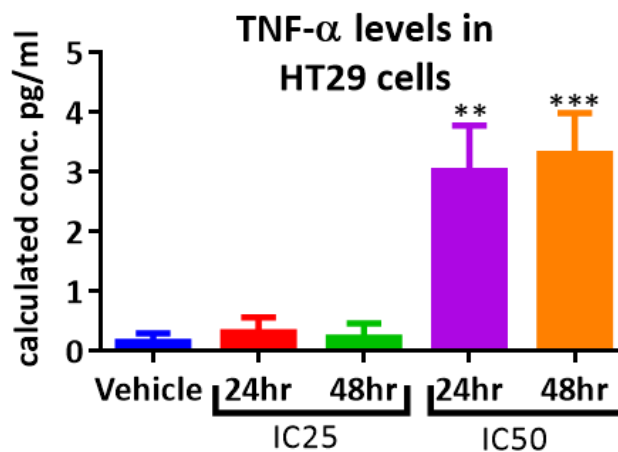



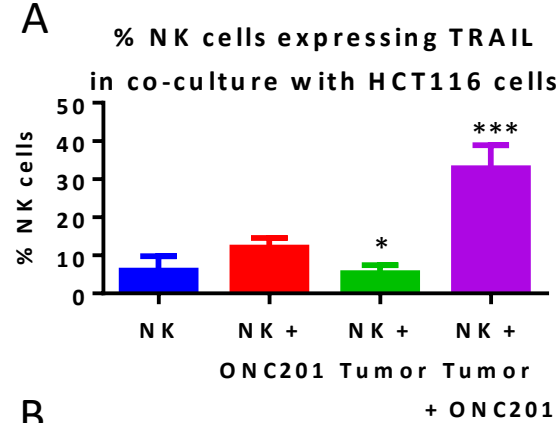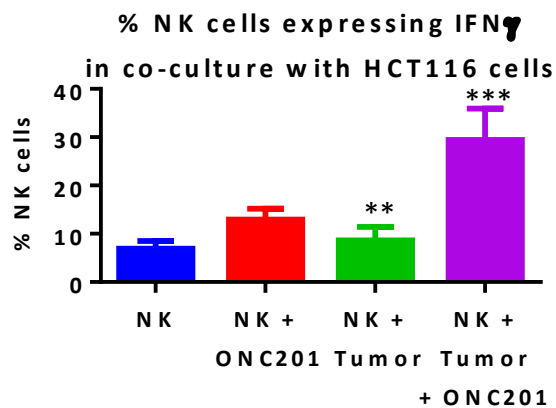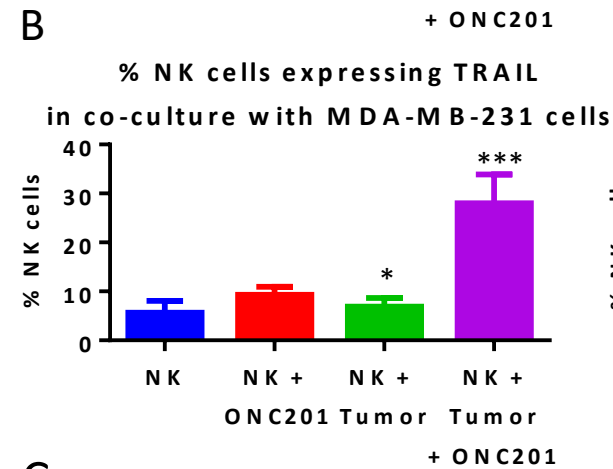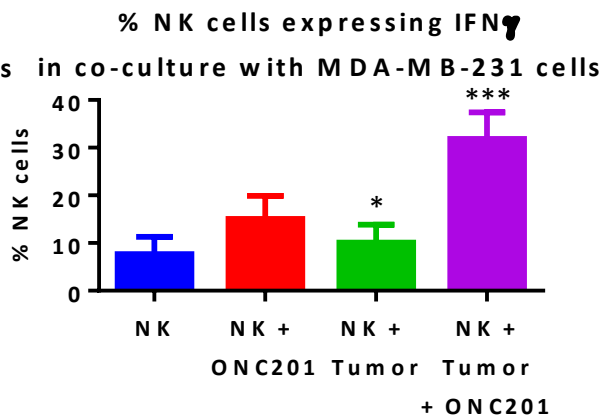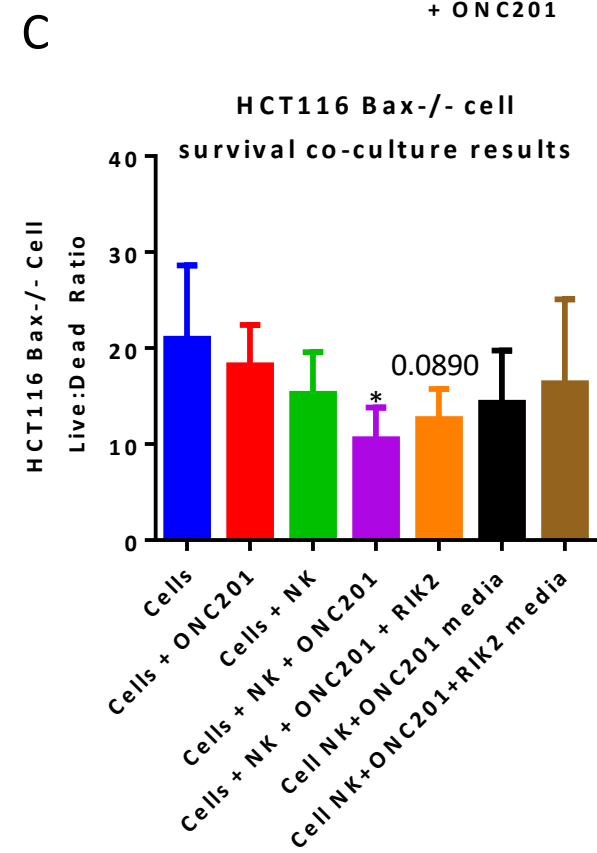

**D**

|                            | Viability | St. Dev. |
|----------------------------|-----------|----------|
| Cells                      | 100.00%   | 8.31%    |
| Cells + ONC201             | 83.90%    | 2.59%    |
| Cells + ONC201 + RIK2      | 89.14%    | 3.53%    |
| Cells + NK                 | 91.94%    | 10.24%   |
| Cells + NK + ONC201        | 2.08%     | 1.36%    |
| Cells + NK + ONC201 + RIK2 | 1.47%     | 0.46%    |
| Cells + NK + IL-2          | 4.00%     | 3.39%    |
| Cells + NK + IFN $\gamma$  | 4.41%     | 3.23%    |

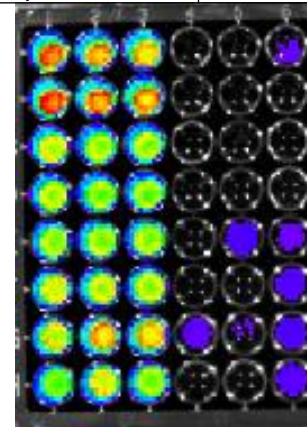

**E**

|                                     |                                                      |
|-------------------------------------|------------------------------------------------------|
| Cells Untreated                     | Cells + NK pretreated with ONC201 10uM               |
| Cells + ONC201 + 10uM               | Cells + NK pretreated with ONC201 10uM + RIK2 2ug/ml |
| Cells + ONC201 + 10uM + RIK2 2ug/ml | Cells + NK pretreated with IL-2                      |
| Cells + NK alone                    | Cells + NK pretreated with IFN $\gamma$              |

## Supplemental Table 1: Antibody Chart

|                                     | Reactivity  | Company          | Catalogue Number      |
|-------------------------------------|-------------|------------------|-----------------------|
| pERK                                | Human/Mouse | CS               | 9106s                 |
| p-Akt                               | Human/Mouse | CS               | 9275s                 |
| ERK                                 | Human/Mouse | CS               | 9102s                 |
| Akt                                 | Human/Mouse | CS               | 4685s                 |
| $\beta$ -actin                      | Human/Mouse | Sigma            | A5441                 |
| NKp46 mouse (Flow)                  | Mouse       | eBioscience      | 48-3351-82/11-3351-82 |
| CD3 (Flow)                          | Mouse       | eBioscience      | 47-0032-80            |
| CD45 (Flow)                         | Mouse       | eBioscience      | 83-0451-41            |
| CD19 (Flow)                         | Mouse       | eBioscience      | 17-0193-80/12-0193-82 |
| EPCAM-1 human (Flow)                | Human       | eBioscience      | 53-8326-41            |
| EPCAM-1 mouse (flow)                | Mouse       | eBioscience      | 11-5791-80            |
| IFN $\gamma$ (Flow)                 | Mouse       | eBioscience      | 11-7311-41            |
| Granzyme B (Flow)                   | Mouse       | eBioscience      | 11-8898-80            |
| GM-1                                | Mouse       | Wako             | 986-10001             |
| TRAIL (IHC)                         | Human       | CS               | 3219S                 |
| NK1.1 (Flow)                        | Mouse       | eBioscience      | 12-5941-81            |
| CD11b(Flow)                         | Mouse       | Biologend        | 101225                |
| TRAIL mouse(Flow)                   | Mouse       | Biologend        | 109305                |
| TRAIL human (Flow)                  | Human       | Biologend        | 308206                |
| F4/80 (Flow)                        | Mouse       | Thermo/Fisher    | MF48000               |
| Ly6G/GR-1 (Flow)                    | Mouse       | eBioscience      | 127605                |
| NKp46 (IF/IHC)                      | Mouse       | R&D Systems      | AF2225-SP             |
| PD-1 (mouse/IHC)                    | Mouse       | Biologend        | 114101                |
| CD27 (Flow)                         | Mouse       | eBioscience      | 46-0271-80            |
| EPCAM-1 human (IF)                  | Human       | CS               | 2929S                 |
| CD56/NK human (IF)                  | Human       | Biologend        | 318309                |
| Ki67 (IHC)                          | Mouse       | Dako             | M7249                 |
| Ki67 (IHC)                          | Human       | Dako             | M7240                 |
| Cleaved Caspase-3                   | Human       | CS               | 9661                  |
| PD-1 (IF)                           | Mouse       | eBioscience      | 12-9981-81            |
| CD-8a (IF)                          | Mouse       | eBioscience      | 17-0081-81            |
| IFN $\gamma$ secretion Assay (Flow) | Human       | Miltenyi Biotech | 130-054-202           |
| LAMP 1+ (Flow Human Primary)        | Human       | Biologend        | 3208608               |
| CD56 (Flow Human Primary)           | Human       | BD Bioscience    | 563554                |
| CD45 (Flow Human Primary)           | Human       | eBioscience      | 45-9459-42            |
| CD3 (Flow Human Primary)            | Human       | BD Bioscience    | 560176                |
| CD3 (Human Study)                   | Human       | eBioscience      | 56-0037-42            |
| CD19 (Human Study)                  | Human       | Biologend        | 302252                |
| CD56 (Human Study)                  | Human       | BD Bioscience    | 335791                |
| Granzyme B (Human Study)            | Human       | Biologend        | 515406                |
| TRAIL (Human Study)                 | Human       | eBioscience      | 12-9927-42            |
| LIVE/DEAD (Human Study)             | -----       | Invitrogen       | L34966                |
